# Supplementary material for: Rhodium-catalyzed aminohydroxylation of unactivated alkenes in aqueous media for the benign synthesis of 1,2-amino alcohols
Source: Royal Society of Chemistry journal article supplement (doi:10.1039/c8gc03803a), 2019-01-01

## Supporting Information

### **Rhodium-catalyzed aminohydroxylation of unactivated alkenes in aqueous media for the benign synthesis of 1, 2-amino alcohols**

Yufeng Shi, Yufan Wang, Xunbo Lu, Yulong Zhang, Yuzhou Wu and Fangrui Zhong \*

Hubei Key Laboratory of Bioinorganic Chemistry & Materia Medica, School of Chemistry and Chemical Engineering, Huazhong University of Science and Technology (HUST), 1037 Luoyu road, Wuhan 430074, China  
chemzfr@hust.edu.cn

#### Table of contents

|                                                                                  |             |
|----------------------------------------------------------------------------------|-------------|
| A. General                                                                       | Information |
| .....                                                                            | S2          |
| B. Results for Some Other Alkenes.....                                           | S2          |
| C. Representative                                                                | Procedures  |
| .....                                                                            | S2          |
| D. Analytical Data of Aminohydroxylation Products.....                           | S3          |
| E. <sup>1</sup> H NMR and <sup>13</sup> C NMR Spectra Data for All Products..... | S12         |

## A. General Information

Chemicals and solvents were purchased from commercial suppliers and used as received unless noted. All products were purified by flash chromatography on silica gel. The chemical yields referred are isolated products.  $^1\text{H}$  NMR and  $^{13}\text{C}$  NMR spectra were recorded on 400 MHz or 600 MHz Bruker spectrometers. Chemical shifts of  $^1\text{H}$  were reported in part per million relative to the  $\text{CDCl}_3$  residual peak ( $\delta$  7.26). Chemical shifts of  $^{13}\text{C}$  NMR were reported relative to  $\text{CDCl}_3$  ( $\delta$  77.16). And for  $\text{CD}_3\text{OD}$  the chemical shifts of  $^1\text{H}$  NMR residual peak ( $\delta$  3.31), chemical shifts of  $^{13}\text{C}$  NMR were reported relative to  $\text{CD}_3\text{OD}$  ( $\delta$  49.00). The used abbreviations are as follows: s (singlet), d (doublet), t (triplet), q. (Quartet), quint. (Quintet), m (multiplet), br (broad). Multiplets which arise from accidental equality of coupling constants of magnetically non-equivalent protons are marked as virtual (*virt.*) High resolution mass spectra (HRMS) data were measured on a ESI-microTOF II. Melting points were measured on a SGW® X-4B and are not corrected. Reactions were monitored by TLC analysis using silica gel 60 Å F-254 thin layer plates and compounds were visualized with a UV light at 254 nm or 365 nm. Further visualization was achieved by staining with iodine, or  $\text{KMnO}_4$  followed by heating on a hot plate. Flash column chromatography was performed on silica gel 60 Å, 10–40  $\mu\text{m}$ .

The catalyst  $\text{Rh}_2(\text{esp})_2$  was prepared following the literature procedure;<sup>1</sup> sulfamates **2** were synthesized by reported procedures.<sup>2</sup>

## B. Results for Some Other Alkenes

| entry | substrate                                                                           | product                                                                                           | Yield (%) |
|-------|-------------------------------------------------------------------------------------|---------------------------------------------------------------------------------------------------|-----------|
| 1     | 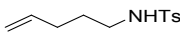 | <br><b>18</b> | 74        |
| 2     |  | <br><b>19</b> | 74        |
| 4     |  | <br><b>20</b>  | 95        |
| 5     |  | <br><b>21</b> | 99        |

Reaction conditions refer to the representative procedure below. For entries 2 and 5, no amino alcohols were observed when 1 eq. of  $\text{BF}_3 \cdot \text{Et}_2\text{O}$  was added.

## C. Representative Procedure

To a 5 mL vial containing  $\text{Rh}_2(\text{esp})_2$  (1.1 mg, 1.5 mol %),  $\text{TcesNH}_2$  (22.8 mg, 0.1 mmol, 1.0 eq), alkene substrate (15.6 mg, 0.15 mmol, 1.5 eq) in 2.0 mL PBS buffer was added  $\text{PhI}(\text{OAc})_2$  (64.4 mg, 0.2 mmol, 2.0 eq). The reaction mixture was heated to 40 °C for 48 h, and then extracted with  $\text{CH}_2\text{Cl}_2$  (3 x 10 mL). The organic layers were dried over  $\text{Na}_2\text{SO}_4$ , filtered, concentrated in vacuum and the residue was purified by chromatography on silica gel.

## D. Analytical Data of Aminohydroxylation Products

### 2, 2, 2-Trichloroethyl (2-hydroxy-2-phenylethyl) sulfamate (4a)

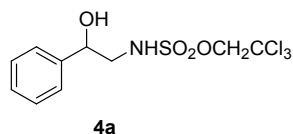

A pale yellow oil. 38.0 mg, 91% yield.

**TLC:**  $R_f$  = 0.35 (Hexane/EtOAc = 3:1) [UV, KMnO<sub>4</sub>].

**<sup>1</sup>H NMR** (600 MHz, CDCl<sub>3</sub>)  $\delta$  7.43 – 7.35 (m, 5H), 5.44 (br, 1H), 5.02 (dd,  $J$  = 8.8, 3.6 Hz, 1H), 4.65 (d,  $J$  = 11.0 Hz, 1H), 4.61 (d,  $J$  = 11.0 Hz, 1H), 3.54 (ddd,  $J$  = 13.2, 8.0, 3.6 Hz, 1H), 3.37 (ddd,  $J$  = 13.2, 8.8, 3.4 Hz, 1H), 2.49 (br, 1H).

**<sup>13</sup>C NMR** (101 MHz, CDCl<sub>3</sub>)  $\delta$  140.3, 128.9, 128.7, 125.6, 93.4, 78.3, 72.5, 50.6.

**HRMS (ESI):** C<sub>10</sub>H<sub>10</sub><sup>35</sup>Cl<sub>3</sub>NO<sub>3</sub>S [(M+Na)<sup>+</sup>]: calcd.: 328.9447; found: 328.9449.

### Neopentyl (2-hydroxy-2-phenylethyl) sulfamate (4b)

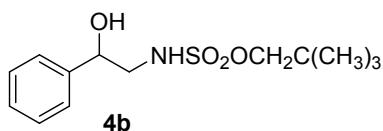

A pale yellow oil. 22.4 mg, 82% yield.

**TLC:**  $R_f$  = 0.35 (Hexane/EtOAc = 3:1) [UV, KMnO<sub>4</sub>].

**<sup>1</sup>H NMR** (400 MHz, CDCl<sub>3</sub>)  $\delta$  7.43 – 7.36 (m, 5H), 5.05 (dd,  $J$  = 8.2, 4.3 Hz, 1H), 4.98 (*virt. dt*,  $J$   $\approx$  8.7, 3.5 Hz, 1H), 3.82 (d,  $J$  = 8.9 Hz, 1H), 3.76 (d,  $J$  = 8.9 Hz, 1H), 3.47 – 3.40 (m, 1H), 3.27 (ddd,  $J$  = 13.3, 8.7, 4.3 Hz, 1H), 2.47 (d,  $J$  = 3.5 Hz, 1H), 1.00 (s, 9H).

**<sup>13</sup>C NMR** (101 MHz, CDCl<sub>3</sub>)  $\delta$  140.6, 128.8, 128.4, 125.9, 79.8, 72.7, 50.5, 31.6, 26.1.

**HRMS (ESI):** C<sub>13</sub>H<sub>21</sub>NO<sub>4</sub>S [(M+Na)<sup>+</sup>]: calcd.: 310.1083; found: 310.1085.

### 2, 2, 2-Trifluoroethyl (2-hydroxy-2-phenylethyl) sulfamate (4c)

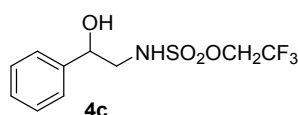

A pale yellow oil. 22.8 mg, 77% yield.

**TLC:**  $R_f$  = 0.43 (Hexane/EtOAc = 3:1) [UV, KMnO<sub>4</sub>].

**<sup>1</sup>H NMR** (400 MHz, CDCl<sub>3</sub>)  $\delta$  7.44 – 7.35 (m, 5H), 5.48 (dd,  $J$  = 8.1, 4.0 Hz, 1H), 4.98 (*virt. dt*,  $J$   $\approx$  8.8, 3.3 Hz, 1H), 4.50 – 4.33 (m, 2H), 3.48 (ddd,  $J$  = 13.5, 8.0, 3.6 Hz, 1H), 3.34 (ddd,  $J$  = 13.2, 8.8, 3.8 Hz, 1H), 2.56 (d,  $J$  = 3.2 Hz, 1H).

**<sup>13</sup>C NMR** (101 MHz, CDCl<sub>3</sub>)  $\delta$  140.2, 128.9, 128.7, 125.8, 122.1 (q,  $J$  = 278.5 Hz), 72.5, 65.1 (q,  $J$  = 38.6 Hz), 50.5.

**HRMS (ESI):** C<sub>10</sub>H<sub>12</sub>F<sub>3</sub>NO<sub>4</sub>S [(M+Na)<sup>+</sup>]: calcd.: 322.0331; found: 322.0336.

### Phenyl (2-hydroxy-2-phenylethyl) sulfamate (4d)

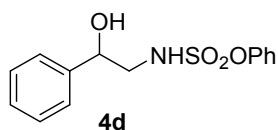

A pale yellow oil. 27.4 mg, 70% yield.

**TLC:**  $R_f$  = 0.40 (Hexane/EtOAc = 3:1) [UV,  $\text{KMnO}_4$ ].

**$^1\text{H NMR}$**  (600 MHz,  $\text{CDCl}_3$ )  $\delta$  7.43 – 7.24 (m, 10H), 5.31 (s, 1H), 4.90 (dd,  $J$  = 8.9, 4.0 Hz, 1H), 3.50 (ddd,  $J$  = 13.3, 8.0, 4.1 Hz, 1H), 3.33 (ddd,  $J$  = 13.3, 8.9, 4.1 Hz, 1H), 2.41 – 1.98 (br, 1H).

**$^{13}\text{C NMR}$**  (101 MHz,  $\text{CDCl}_3$ )  $\delta$  150.0, 140.4, 129.9, 128.8, 128.6, 127.1, 125.9, 121.9, 72.7, 50.9.

**HRMS (ESI):**  $\text{C}_{14}\text{H}_{15}\text{NO}_4\text{S}$  [(M+Na) $^+$ ]: calcd.: 316.0614; found: 316.0618.

#### 2, 2, 2-Trichloroethyl (2-(4-chlorophenyl)-2-hydroxyethyl) sulfamate (4e)

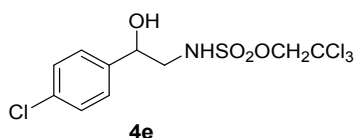

A pale yellow oil. 30.5 mg, 84% yield.

**TLC:**  $R_f$  = 0.35 (Hexane/EtOAc = 3:1) [UV,  $\text{KMnO}_4$ ].

**$^1\text{H NMR}$**  (600 MHz,  $\text{CDCl}_3$ )  $\delta$  7.44 – 7.37 (d,  $J$  = 8.4 Hz, 2H), 7.34 (d,  $J$  = 8.5 Hz, 2H), 5.28 (br, 1H), 5.04 – 5.00 (m, 1H), 4.66 (d,  $J$  = 10.9 Hz, 1H), 4.63 (d,  $J$  = 10.9 Hz, 1H), 3.52 (ddd,  $J$  = 13.6, 8.5, 3.8 Hz, 1H), 3.33 (ddd,  $J$  = 13.3, 8.5, 3.8 Hz, 1H), 2.37 (br, 1H).

**$^{13}\text{C NMR}$**  (101 MHz,  $\text{CDCl}_3$ )  $\delta$  138.8, 134.5, 129.1, 127.3, 93.4, 71.9, 50.6.

**HRMS (ESI):**  $\text{C}_{10}\text{H}_{11}^{35}\text{Cl}_4\text{NO}_4\text{S}$  [(M+Na) $^+$ ]: calcd.: 403.9055; found: 403.9060.

#### 2, 2, 2-Trichloroethyl (2-hydroxy-2-(p-tolyl) ethyl) sulfamate (4f)

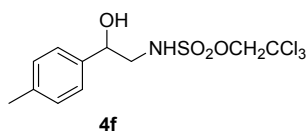

A pale yellow oil. 33.9 mg, 93% yield.

**TLC:**  $R_f$  = 0.34 (Hexane/EtOAc = 3:1) [UV,  $\text{KMnO}_4$ ].

**$^1\text{H NMR}$**  (400 MHz,  $\text{CDCl}_3$ )  $\delta$  7.27 (d,  $J$  = 7.9 Hz, 2H), 7.21 (d,  $J$  = 8.0 Hz, 2H), 5.54 (s, 1H), 4.96 (dd,  $J$  = 8.7, 3.6 Hz, 1H), 4.62 (d,  $J$  = 10.9 Hz, 1H), 4.57 (d,  $J$  = 10.9 Hz, 1H), 3.50 (dd,  $J$  = 13.5, 3.7 Hz, 1H), 3.35 (dd,  $J$  = 13.7, 8.9 Hz, 1H), 2.37 (s, 3H).

**$^{13}\text{C NMR}$**  (151 MHz,  $\text{CDCl}_3$ )  $\delta$  138.6, 137.3, 129.6, 125.8, 93.5, 78.3, 72.3, 50.6, 21.2.

**HRMS (ESI):**  $\text{C}_{11}\text{H}_{14}^{35}\text{Cl}_3\text{NO}_4\text{S}$  [(M+Na) $^+$ ]: calcd.: 383.9601; found: 383.9607.

#### 2, 2, 2-Trichloroethyl (2-(4-fluorophenyl)-2-hydroxyethyl) sulfamate (4g)

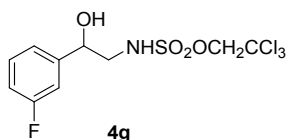

A pale yellow oil. 22.5 mg, 73% yield.

**TLC:**  $R_f$  = 0.37 (Hexane/EtOAc = 3:1) [UV,  $\text{KMnO}_4$ ].

**$^1\text{H NMR}$**  (400 MHz,  $\text{CDCl}_3$ )  $\delta$  7.38 (*virt. td*,  $J \approx 8.1, 5.9$  Hz, 1H), 7.19 – 7.11 (m, 2H), 7.08 – 7.03 (m, 1H), 5.46 (brs, 1H), 5.04 (dd,  $J$  = 8.8, 3.5 Hz, 1H), 4.66 (d,  $J$  = 11.0 Hz, 1H), 4.63 (d,  $J$  = 11.0 Hz, 1H), 3.54 (dd,  $J$  = 14.8, 3.3 Hz, 1H), 3.33 (dd,  $J$  = 13.8, 8.9 Hz, 1H), 2.62 (br, 1H).

<sup>13</sup>C NMR (101 MHz, CDCl<sub>3</sub>) δ 163.1 (d, *J* = 246.6 Hz), 142.9 (d, *J* = 6.6 Hz), 130.5 (d, *J* = 8.0 Hz), 121.4 (d, *J* = 2.3 Hz), 115.5 (d, *J* = 22.0 Hz), 112.9 (d, *J* = 23.3 Hz), 93.4, 78.3, 71.9 (d, *J* = 1.7 Hz), 50.5.

HRMS (ESI): C<sub>10</sub>H<sub>11</sub><sup>35</sup>Cl<sub>3</sub>FNO<sub>4</sub>S [(M+Na)<sup>+</sup>]: calcd.: 364.9458; found: 364.9458.

#### 2, 2, 2-Trichloroethyl (2-hydroxy-2-(3-methoxyphenyl) ethyl) sulfamate (4h)

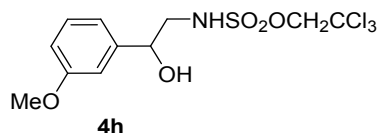

A colorless oil. 22.8 mg, 60% yield.

TLC: *R*<sub>f</sub> = 0.47 (Hexane/EtOAc = 3:1) [UV, KMnO<sub>4</sub>].

<sup>1</sup>H NMR (600 MHz, CDCl<sub>3</sub>) δ 7.32 (*virt. t.*, *J* ≈ 7.9 Hz, 1H), 6.98 – 6.92 (m, 2H), 6.89 (m, *J* = 8.3, 2.6, 0.9 Hz, 1H), 4.98 (dd, *J* = 8.8, 3.6 Hz, 1H), 4.61 (d, *J* = 11.0 Hz, 1H), 4.57 (d, *J* = 11.0 Hz, 1H), 3.83 (s, 3H), 3.52 (dd, *J* = 13.6, 3.6 Hz, 1H), 3.35 (dd, *J* = 13.6, 8.8 Hz, 1H).

<sup>13</sup>C NMR (101 MHz, CDCl<sub>3</sub>) δ 160.0, 142.0, 130.0, 118.0, 114.1, 111.5, 93.4, 78.2, 72.4, 55.3, 50.6.

HRMS (ESI): C<sub>11</sub>H<sub>14</sub><sup>35</sup>Cl<sub>3</sub>NO<sub>5</sub>S [(M+Na)<sup>+</sup>]: calcd.: 399.9550; found: 399.9557.

#### 2, 2, 2-Trichloroethyl (2-hydroxy-2-(*o*-tolyl) ethyl) sulfamate (4i)

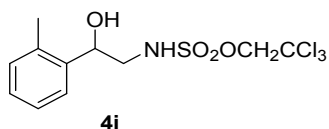

A pale yellow oil. 30.2 mg, 83% yield.

TLC: *R*<sub>f</sub> = 0.36 (Hexane/EtOAc = 3:1) [UV, KMnO<sub>4</sub>].

<sup>1</sup>H NMR (400 MHz, CDCl<sub>3</sub>) δ 7.50 (dd, *J* = 7.0, 2.1 Hz, 1H), 7.31 – 7.23 (m, 2H), 7.19 (dd, *J* = 7.0, 2.0 Hz, 1H), 5.39 (br, 1H), 5.26 (dd, *J* = 9.1, 3.2 Hz, 1H), 4.67 (d, *J* = 10.9 Hz, 1H), 4.61 (d, *J* = 10.9 Hz, 1H), 3.52 (dd, *J* = 13.8, 3.2 Hz, 1H), 3.28 (dd, *J* = 13.7, 9.1 Hz, 1H), 2.39 (s, 3H), 2.22 (br, 1H).

<sup>13</sup>C NMR (101 MHz, CDCl<sub>3</sub>) δ 138.4, 130.8, 128.4, 126.6, 125.2, 93.4, 78.3, 69.3, 49.6, 18.9.

HRMS (ESI): C<sub>11</sub>H<sub>14</sub><sup>35</sup>Cl<sub>3</sub>NO<sub>4</sub>S [(M+Na)<sup>+</sup>]: calcd.: 383.9601; found: 383.9606.

#### 2, 2, 2-Trichloroethyl (2-(2-chlorophenyl)-2-hydroxyethyl) sulfamate (4j)

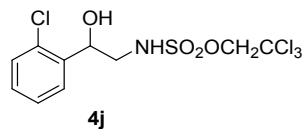

A pale yellow oil. 30.1 mg, 96% yield.

TLC: *R*<sub>f</sub> = 0.35 (Hexane/EtOAc = 3:1) [UV, KMnO<sub>4</sub>].

<sup>1</sup>H NMR (400 MHz, CDCl<sub>3</sub>) δ 7.62 (dd, *J* = 7.6, 1.8 Hz, 1H), 7.41 – 7.29 (m, 3H), 5.47 – 5.40 (m, 2H), 4.66 (d, *J* = 10.9 Hz, 1H), 4.59 (d, *J* = 10.9 Hz, 1H), 3.69 (ddd, *J* = 13.5, 7.9, 3.1 Hz, 1H), 3.31 (ddd, *J* = 13.5, 8.4, 4.2 Hz, 1H), 2.65 (d, *J* = 3.4 Hz, 1H).

<sup>13</sup>C NMR (101 MHz, CDCl<sub>3</sub>) δ 137.6, 131.8, 129.8, 129.6, 127.4, 127.2, 93.4, 78.4, 69.3, 48.8.

HRMS (ESI): C<sub>10</sub>H<sub>11</sub><sup>35</sup>Cl<sub>4</sub>NO<sub>4</sub>S [(M+Na)<sup>+</sup>]: calcd.: 403.9055; found: 403.9060.

### 2, 2, 2-Trichloroethyl (2-hydroxy-2-(naphthalen-2-yl) ethyl) sulfamate (4k)

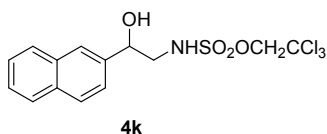

A pale yellow oil. 30.8 mg, 77% yield.

**TLC:**  $R_f = 0.33$  (Hexane/EtOAc = 3:1) [UV,  $\text{KMnO}_4$ ].

**$^1\text{H NMR}$**  (600 MHz,  $\text{CDCl}_3$ )  $\delta$  7.91 – 7.84 (m, 4H), 7.58 – 7.53 (m, 2H), 7.47 (dd,  $J = 8.5, 1.7$  Hz, 1H), 5.41 (br, 1H), 5.18 (dd,  $J = 8.7, 3.6$  Hz, 1H), 4.64 (d,  $J = 10.9$  Hz, 1H), 4.60 (d,  $J = 10.9$  Hz, 1H), 3.62 (ddd,  $J = 13.3, 7.9, 3.7$  Hz, 1H), 3.46 (ddd,  $J = 13.3, 8.6, 3.5$  Hz, 1H), 2.56 (s, 1H).

**$^{13}\text{C NMR}$**  (101 MHz,  $\text{CDCl}_3$ )  $\delta$  137.6, 133.3, 133.2, 128.9, 128.0, 127.8, 126.7, 126.5, 125.0, 123.4, 93.4, 78.3, 72.6, 50.6.

**HRMS (ESI):**  $\text{C}_{14}\text{H}_{14}^{35}\text{Cl}_3\text{NO}_4\text{S}$  [(M+Na) $^+$ ]: calcd.: 419.9601; found: 419.9610.

### 2, 2, 2-Trichloroethyl ((1R, 2S)-1-hydroxy-1-phenylpropan-2-yl) sulfamate (4l)

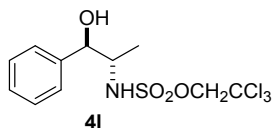

A colorless oil. 28.7 mg, 82% yield.

**TLC:**  $R_f = 0.40$  (Hexane/EtOAc = 3:1) [UV,  $\text{KMnO}_4$ ].

**$^1\text{H NMR}$**  (400 MHz,  $\text{CDCl}_3$ )  $\delta$  7.44 – 7.35 (m, 5H), 5.24 (d,  $J = 9.1$  Hz, 1H), 5.12 (d,  $J = 3.2$  Hz, 1H), 4.66 (s, 2H), 3.93 – 3.85 (m, 1H), 2.42 (s, 1H), 1.15 (d,  $J = 6.9$  Hz, 3H).

**$^{13}\text{C NMR}$**  (101 MHz,  $\text{CDCl}_3$ )  $\delta$  139.9, 128.7, 128.2, 125.9, 93.5, 78.1, 75.3, 56.12, 14.3.

**HRMS (ESI):**  $\text{C}_{11}\text{H}_{14}^{35}\text{Cl}_3\text{NO}_4\text{S}$  [(M+Na) $^+$ ]: calcd.: 383.9601; found: 383.9605.

### Neopentyl (2-hydroxy-2-phenylpropyl) sulfamate (4m)

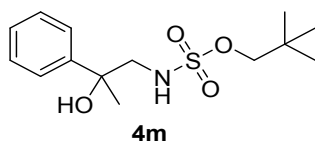

A colorless oil. 21.0 mg, 70% yield.

**TLC:**  $R_f = 0.45$  (Hexane/EtOAc = 3:1) [UV,  $\text{KMnO}_4$ ].

**$^1\text{H NMR}$**  (400 MHz,  $\text{CDCl}_3$ )  $\delta$  7.48 – 7.34 (m, 4H), 7.33 – 7.27 (m, 1H), 4.76 (s, 1H), 3.70 (d,  $J = 8.8$  Hz, 1H), 3.57 (d,  $J = 8.9$  Hz, 1H), 3.43 – 3.33 (m, 2H), 2.38 (d,  $J = 6.6$  Hz, 1H), 1.63 (s, 3H), 0.93 (s, 9H).

**$^{13}\text{C NMR}$**  (151 MHz,  $\text{CDCl}_3$ )  $\delta$  144.6, 128.7, 127.6, 124.8, 79.7, 73.8, 54.2, 31.6, 27.6, 26.1.

**HRMS (ESI):**  $\text{C}_{14}\text{H}_{23}\text{NO}_4\text{S}$  [(M+Na) $^+$ ]: calcd.: 324.1240; found: 324.1243.

### 2, 2, 2-Trichloroethyl ((1-hydroxy-1, 2, 3, 4-tetrahydronaphthalen-1-yl) methyl) sulfamate (4n)

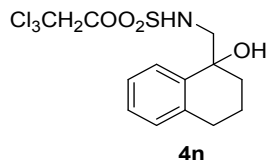

A pale yellow oil. 13.3 mg, 35% yield.

**TLC:**  $R_f$  = 0.45 (Hexane/EtOAc = 3:1) [UV,  $\text{KMnO}_4$ ].

**$^1\text{H NMR}$**  (400 MHz,  $\text{CDCl}_3$ )  $\delta$  7.58 – 7.52 (m, 1H), 7.28 – 7.22 (m, 2H), 7.18 – 7.10 (m, 1H), 5.35 – 5.32 (m, 1H), 4.64 (s, 2H), 3.64 – 3.28 (m, 2H), 3.00 – 2.73 (m, 2H), 2.49 – 2.24 (m, 1H), 2.05 – 1.93 (m, 2H), 1.92 – 1.85 (m, 1H), 1.84 – 1.80 (m, 1H).

**$^{13}\text{C NMR}$**  (101 MHz,  $\text{CDCl}_3$ )  $\delta$  138.9, 137.4, 129.2, 128.3, 126.6, 126.2, 93.5, 78.3, 72.2, 52.2, 34.2, 29.4, 20.0.

**HRMS (ESI):**  $\text{C}_{13}\text{H}_{16}^{35}\text{Cl}_3\text{NO}_4\text{S}$  [(M+Na) $^+$ ]: calcd.: 409.9758; found: 409.9762.

#### 2, 2, 2-Trichloroethyl ((1*RS*, 2*RS*)-1-hydroxy-2, 3-dihydro-1H-inden-2-yl) sulfamate (4o)

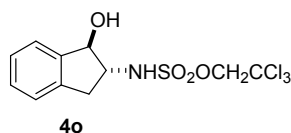

A pale yellow oil. 32.2mg, 90% yield. The product contains a mixture of two inseparable diastereoisomers (d.r.  $\approx$  4:1).

**TLC:**  $R_f$  = 0.39 (Hexane/EtOAc = 3:1) [UV,  $\text{KMnO}_4$ ].

The major diastereoisomer:

**$^1\text{H NMR}$**  (600 MHz,  $\text{CDCl}_3$ )  $\delta$  7.50 (d,  $J$  = 7.1 Hz, 1H), 7.32 – 7.27 (m, 3H), 5.11 (*virt. q*,  $J \approx$  7.6 Hz, 1H), 5.07 – 4.98 (m, 1H), 4.70 (s, 2H), 3.05 (ddd,  $J$  = 16.0, 8.6, 4.2 Hz, 1H), 2.90 (*virt. dt*,  $J \approx$  15.9, 7.9 Hz, 1H), 2.72 – 2.67 (m, 1H), 2.12 – 2.08 (m, 1H).

**$^{13}\text{C NMR}$**  (101 MHz,  $\text{CDCl}_3$ )  $\delta$  143.2, 140.8, 128.9, 127.2, 125.1, 124.4, 93.5, 78.2, 60.1, 34.4, 30.0.

The minor diastereoisomer:

**$^1\text{H NMR}$**  (600 MHz,  $\text{CDCl}_3$ )  $\delta$  7.66 – 7.54 (m, 0.5H), 7.47 – 7.36 (m, 0.5H), 5.69 (d,  $J$  = 9.3 Hz, 0.25H), 5.27 – 5.20 (m, 0.28H), 4.70 (s, 0.5H), 3.71 (q,  $J$  = 7.0 Hz, 0.21H), 3.32 – 3.27 (m, 0.21H), 3.18 – 3.13 (m, 0.25H), 2.72 – 2.67 (m, 0.25H).

**$^{13}\text{C NMR}$**  (101 MHz,  $\text{CDCl}_3$ )  $\delta$  140.3, 134.8, 129.8, 126.7, 124.9, 123.8, 93.4, 78.2, 56.7, 42.7, 36.2, 25.9.

**HRMS (ESI):**  $\text{C}_{11}\text{H}_{12}^{35}\text{Cl}_3\text{NO}_4\text{S}$  [(M+Na) $^+$ ]: calcd.: 381.9445; found: 381.9439.

#### 4-1-Hydroxy-2-((2, 2, 2-trichloroethoxy) sulfonyl) amino-ethyl phenyl acetate (4p)

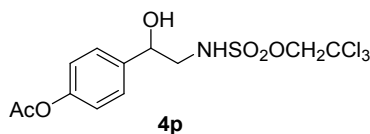

A pale yellow oil. 36.5 mg, 90% yield.

**TLC:**  $R_f$  = 0.35 (Hexane/EtOAc = 3:1) [UV,  $\text{KMnO}_4$ ].

**$^1\text{H NMR}$**  (400 MHz,  $\text{CDCl}_3$ )  $\delta$  7.41 – 7.37 (m, 2H), 7.13 – 7.09 (m, 2H), 5.60 (dd,  $J$  = 8.2, 4.2 Hz, 1H),

5.01 – 4.89 (m, 1H), 4.65 (d,  $J = 11.0$  Hz, 1H), 4.62 (d,  $J = 11.0$  Hz, 1H), 3.47 (ddd,  $J = 13.4, 8.0, 3.7$  Hz, 1H), 3.30 (ddd,  $J = 13.4, 8.8, 4.0$  Hz, 1H), 2.80 (br, 1H), 2.33 (s, 3H).

$^{13}\text{C NMR}$  (101 MHz,  $\text{CDCl}_3$ )  $\delta$  169.9, 150.6, 138.1, 127.1, 122.0, 93.4, 78.2, 71.9, 50.5, 21.1.

**HRMS (ESI):**  $\text{C}_{12}\text{H}_{14}^{35}\text{Cl}_3\text{NO}_6\text{S}$  [(M+Na) $^+$ ]: calcd.: 427.9500; found: 427.9507.

#### 2, 2, 2-Trichloroethyl (2-(4-((tert-butoxycarbonyl) amino) phenyl)-2-hydroxypropyl) sulfamate (4q)

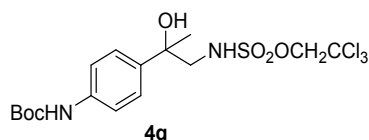

A pale yellow oil. 19.5 mg, 40% yield.

**TLC:**  $R_f = 0.45$  (Hexane/EtOAc = 3:1) [UV,  $\text{KMnO}_4$ ].

$^1\text{H NMR}$  (400 MHz,  $\text{CDCl}_3$ )  $\delta$  7.45 – 7.35 (m, 5H), 6.57 (br, 1H), 5.12 (br, 1H), 4.54 (d,  $J = 11.0$  Hz, 1H), 4.39 (d,  $J = 11.0$  Hz, 1H), 3.46 (dd,  $J = 5.9, 3.2$  Hz, 2H), 2.31 (br, 1H), 1.65 (s, 3H), 1.54 (s, 9H).

$^{13}\text{C NMR}$  (101 MHz,  $\text{CDCl}_3$ )  $\delta$  152.8, 138.8, 137.9, 125.6, 118.8, 93.4, 80.9, 78.2, 73.5, 54.5, 28.3, 27.5.

**HRMS (ESI):**  $\text{C}_{15}\text{H}_{21}^{35}\text{Cl}_3\text{N}_2\text{O}_6\text{S}$  [(M+Na) $^+$ ]: calcd.: 485.0078; found: 485.0083.

#### 2, 2, 2-Trichloroethyl ((2RS, 3RS)-3-hydroxybicyclo [2.2.1] heptan-2-yl) sulfamate (4r)

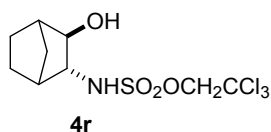

A pale yellow oil. 24.6mg, 73% yield.

**TLC:**  $R_f = 0.38$  (Hexane/EtOAc = 3:1) [ $\text{KMnO}_4$ ].

$^1\text{H NMR}$  (400 MHz,  $\text{CDCl}_3$ )  $\delta$  6.51 (d,  $J = 8.6$  Hz, 1H), 4.72 – 4.58 (m, 2H), 4.11 – 4.01 (m, 1H), 3.66 (*virt. dt*,  $J \approx 8.6, 1.5$  Hz, 1H), 2.58 – 2.56 (m, 1H), 2.29 (d,  $J = 4.5$  Hz, 1H), 1.93 (dd,  $J = 14.1, 6.9$  Hz, 1H), 1.89 – 1.80 (m, 1H), 1.71 – 1.59 (m, 4H), 1.20 – 1.12 (m, 1H), 1.10 – 1.02 (m, 1H).

$^{13}\text{C NMR}$  (101 MHz,  $\text{CDCl}_3$ )  $\delta$  93.7, 78.0, 75.9, 62.9, 45.7, 39.7, 38.7, 25.9, 22.0.

**HRMS (ESI):**  $\text{C}_9\text{H}_{14}^{35}\text{Cl}_3\text{NO}_4\text{S}$  [(M+Na) $^+$ ]: calcd.: 336.9709; found: 336.9705.

#### 2, 2, 2-Trichloroethyl (3-hydroxy-3-methylbutan-2-yl) sulfamate (4s)

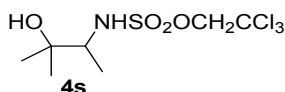

A pale yellow oil. 27.4 mg, 87% yield.

**TLC:**  $R_f = 0.42$  (Hexane/EtOAc = 3:1) [ $\text{KMnO}_4$ ].

$^1\text{H NMR}$  (600 MHz,  $\text{CDCl}_3$ )  $\delta$  5.17 (d,  $J = 8.2$  Hz, 1H), 4.68 (d,  $J = 11.0$  Hz, 1H), 4.66 (d,  $J = 11.0$  Hz, 1H), 3.53 – 3.46 (m, 1H), 1.67 (d,  $J = 3.4$  Hz, 2H), 1.37 (s, 3H), 1.35 (d,  $J = 7.0$  Hz, 3H), 1.27 (s, 3H).

$^{13}\text{C NMR}$  (151 MHz,  $\text{CDCl}_3$ )  $\delta$  93.6, 78.0, 72.5, 59.3, 27.7, 25.8, 16.2.

**HRMS (ESI):**  $\text{C}_7\text{H}_{14}^{35}\text{Cl}_3\text{NO}_4\text{S}$  [(M+Na) $^+$ ]: calcd.: 335.9601; found: 335.9605.

#### 2, 2, 2-Trichloroethyl (2-ethyl-2-hydroxybutyl) sulfamate (4t)



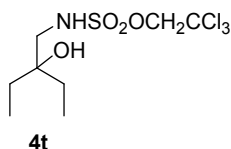

A pale yellow oil. 22.4 mg, 69% yield.

**TLC:**  $R_f = 0.40$  (Hexane/EtOAc = 3:1) [ $\text{KMnO}_4$ ].

**$^1\text{H NMR}$**  (400 MHz,  $\text{CDCl}_3$ )  $\delta$  5.36 – 5.33 (m, 1H), 4.64 (s, 2H), 3.20 (d,  $J = 5.9$  Hz, 2H), 1.68 (br, 1H), 1.63 – 1.50 (m, 4H), 0.90 (t,  $J = 7.5$  Hz, 6H).

**$^{13}\text{C NMR}$**  (101 MHz,  $\text{CDCl}_3$ )  $\delta$  93.5, 78.2, 74.5, 50.3, 28.7, 7.6.

**HRMS (ESI):**  $\text{C}_8\text{H}_{16}^{35}\text{Cl}_3\text{NO}_4\text{S}$  ( $\text{M}+\text{Na}$ ) $^+$ : calcd.: 349.9758; found: 349.9760.

#### 2, 2, 2-Trichloroethyl ((1*RS*, 2*RS*)-2-hydroxycyclohex-3-en-1-yl) sulfamate (4u)

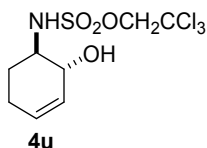

A pale yellow oil. 20.2 mg, 62% yield.

**TLC:**  $R_f = 0.43$  (Hexane/EtOAc = 3:1) [ $\text{KMnO}_4$ ].

**$^1\text{H NMR}$**  (400 MHz,  $\text{CDCl}_3$ )  $\delta$  5.92 – 5.78 (m, 1H), 5.73 – 5.60 (m, 1H), 5.21 (d,  $J = 7.2$  Hz, 1H), 4.73 (d,  $J = 11.0$  Hz, 1H), 4.66 (d,  $J = 11.0$  Hz, 1H), 4.14 (br, 1H), 3.52 (dtd,  $J = 10.7, 7.4, 2.6$  Hz, 1H), 2.34 – 2.13 (m, 4H).

**$^{13}\text{C NMR}$**  (101 MHz,  $\text{CDCl}_3$ )  $\delta$  130.90, 127.7, 93.4, 78.3, 70.1, 57.9, 26.4, 24.0.

**HRMS (ESI):**  $\text{C}_8\text{H}_{12}^{35}\text{Cl}_3\text{NO}_4\text{S}$  [( $\text{M}+\text{Na}$ ) $^+$ ]: calcd.: 322.9553; found: 322.9555.

#### 2, 2, 2-Trichloroethyl (*E*)-(5-hydroxy-2, 5-dimethylhex-3-en-2-yl) sulfamate (4v)

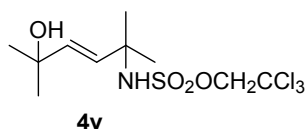

A white solid. 23.9 mg, 68% yield.

**TLC:**  $R_f = 0.41$  (Hexane/EtOAc = 3:1) [ $\text{KMnO}_4$ ].

**$^1\text{H NMR}$**  (400 MHz,  $\text{CDCl}_3$ )  $\delta$  5.85 (d,  $J = 15.7$  Hz, 1H), 5.79 (d,  $J = 15.7$  Hz, 1H), 4.67 (s, 1H), 4.62 (s, 2H), 1.59 (s, 6H), 1.34 (s, 6H).

**$^{13}\text{C NMR}$**  (101 MHz,  $\text{CDCl}_3$ )  $\delta$  137.2, 131.3, 93.5, 78.2, 70.6, 57.7, 29.8, 27.8.

**HRMS (ESI):**  $\text{C}_{10}\text{H}_{18}^{35}\text{Cl}_3\text{NO}_4\text{S}$  ( $\text{M}+\text{Na}$ ) $^+$ : calcd.: 375.9914; found: 375.9921.

#### (2*SR*, 3*RS*)-3-Hydroxy-3-phenyl-2-((2, 2, 2-trichloroethoxy) sulfonyl) Amino-propyl acetate(5)

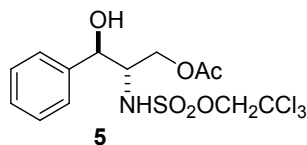

A pale yellow oil. 40mg. 90% yield.

**TLC:**  $R_f = 0.45$  (Hexane/EtOAc = 3:1) [UV,  $\text{KMnO}_4$ ].

**$^1\text{H NMR}$**  (400 MHz,  $\text{CDCl}_3$ )  $\delta$  7.40 – 7.25 (m, 5H), 5.37 (br, 1H), 5.02 (d,  $J = 4.1$  Hz, 1H), 4.49 (d,  $J = 10.8$  Hz, 1H), 4.35 (d,  $J = 10.8$  Hz, 1H), 4.29 (dd,  $J = 11.9, 6.8$  Hz, 1H), 4.03 (dd,  $J = 11.9, 4.0$  Hz, 1H), 3.90 (d,  $J = 6.8$  Hz, 1H), 2.56 (s, 1H), 1.97 (s, 3H).

**$^{13}\text{C NMR}$**  (101 MHz,  $\text{CDCl}_3$ )  $\delta$  171.1, 139.2, 129.0, 128.6, 125.9, 100.0, 78.2, 73.7, 61.6, 59.1, 20.8.

**HRMS (ESI):**  $[\text{C}_{13}\text{H}_{16}^{35}\text{Cl}_3\text{NO}_6\text{S} (\text{M}+\text{Na})^+]$ : calcd.: 441.9656; found: 441.9659.

**(3S)-7-Hydroxy-3, 7-dimethyl-6-((2, 2, 2-trichloroethoxy) sulfonyl) amino) octyl acetate (6)**

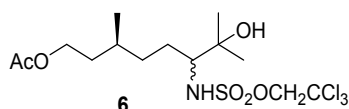

A yellow oil. 19.9 mg, 41% yield. The product contains a mixture of two inseparable diastereoisomers (d.r. = 1:1)

**TLC:**  $R_f = 0.30$  (Hexane/EtOAc = 3:1) [ $\text{KMnO}_4$ ].

**$^1\text{H NMR}$**  (400 MHz,  $\text{CDCl}_3$ )  $\delta$  5.21 – 5.11 (m, 1H), 4.74 – 4.62 (m, 2H), 4.24 – 4.00 (m, 2H), 3.40 – 3.30 (m, 1H), 2.05 (s, 3H), 1.87 – 1.85 (m, 1H), 1.82 – 1.60 (m, 4H), 1.50 – 1.27 (m, 5H), 1.27 (s, 3H), 0.98 – 0.92 (m, 3H).

**$^{13}\text{C NMR}$**  (101 MHz,  $\text{CDCl}_3$ )  $\delta$  171.4, 93.6, 78.0, 72.9, 64.7, 64.6, 62.8, 62.7, 35.5, 35.0, 33.4, 33.2, 30.0, 29.8, 28.4, 28.1, 28.0, 27.9, 26.3, 26.2, 21.1, 19.7, 19.2.

**HRMS (ESI):**  $\text{C}_{14}\text{H}_{26}^{35}\text{Cl}_3\text{NO}_6\text{S} (\text{M}+\text{Na})^+$ : calcd.: 464.0439; found: 464.0442.

**(E)-7-Hydroxy-3, 7-dimethyl-6-((2, 2, 2-trichloroethoxy) sulfonyl) Amino oct-2-en-1-yl acetate (7)**

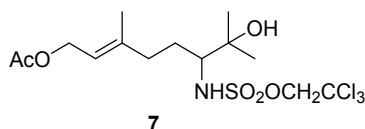

A pale yellow oil. 25.5 mg, 55% yield.

**TLC:**  $R_f = 0.39$  (Hexane/EtOAc = 3:1) [ $\text{KMnO}_4$ ].

**$^1\text{H NMR}$**  (400 MHz,  $\text{CDCl}_3$ )  $\delta$  5.39 (t,  $J = 7.3$  Hz, 1H), 5.29 (d,  $J = 8.8$  Hz, 1H), 4.69 (s, 2H), 4.59 (d,  $J = 7.3$  Hz, 2H), 3.36 (td,  $J = 9.6, 3.0$  Hz, 1H), 2.43 – 2.35 (m, 1H), 2.25 – 2.08 (m, 2H), 2.06 (s, 3H), 1.92 – 1.83 (m, 1H), 1.72 (s, 3H), 1.62 – 1.49 (m, 1H), 1.35 (s, 3H), 1.27 (s, 3H).

**$^{13}\text{C NMR}$**  (101 MHz,  $\text{CDCl}_3$ )  $\delta$  171.3, 141.2, 118.9, 93.6, 78.1, 72.9, 64.1, 61.4, 35.9, 28.9, 27.9, 26.3, 21.1, 16.8.

**HRMS (ESI):**  $\text{C}_{14}\text{H}_{24}^{35}\text{Cl}_3\text{NO}_6\text{S} (\text{M}+\text{Na})^+$ : calcd.: 462.0282; found: 462.0286.

**(4R, 5S)-6-Acetoxyethyl-3-((2, 2, 2-trichloroethoxy) sulfonyl) Amino-Tetrahydro-2H-pyran-2, 4, 5-triyl triacetate (8)**

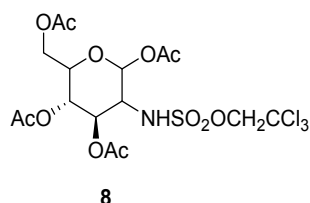

A pale yellow oil. 32.2 mg. 58% yield.

**TLC:**  $R_f$  = 0.42 (Hexane/EtOAc = 1:1) [ $\text{KMnO}_4$ ].

**$^1\text{H NMR}$**  (400 MHz,  $\text{CDCl}_3$ )  $\delta$  6.03 (s, 1H), 5.65 (d,  $J$  = 8.5 Hz, 1H), 5.15 (t,  $J$  = 9.8 Hz, 1H), 5.04 (t,  $J$  = 9.7 Hz, 1H), 4.56 (m, 2H), 4.22 (dd,  $J$  = 12.6, 4.5 Hz, 1H), 4.05 (dd,  $J$  = 12.5, 2.1 Hz, 1H), 3.81 (ddd,  $J$  = 10.1, 4.5, 2.2 Hz, 1H), 3.70 (q,  $J$  = 10.1 Hz, 1H), 2.15 (s, 3H), 2.08 (s, 3H), 2.03 (s, 3H), 1.99 (s, 3H).

The spectra data are matched with those reported.<sup>3</sup>

**Reference:**

1. C. G. Espino, K. W. Fiori, M. Kim, J. Du Bois, *J. Am. Chem. Soc.*, 2004, **126**, 15378.
2. K. W. Fiori, J. Du Bois, *J. Am. Chem. Soc.*, 2007, **129**, 562.
3. K. Guthikonda, P. M. When, B. J. Caliendo, J. Du Bois, *Tetrahedron*, 2006, **62**, 11331.

# E.<sup>1</sup>H and <sup>13</sup>C NMR Spectra Data of All Products

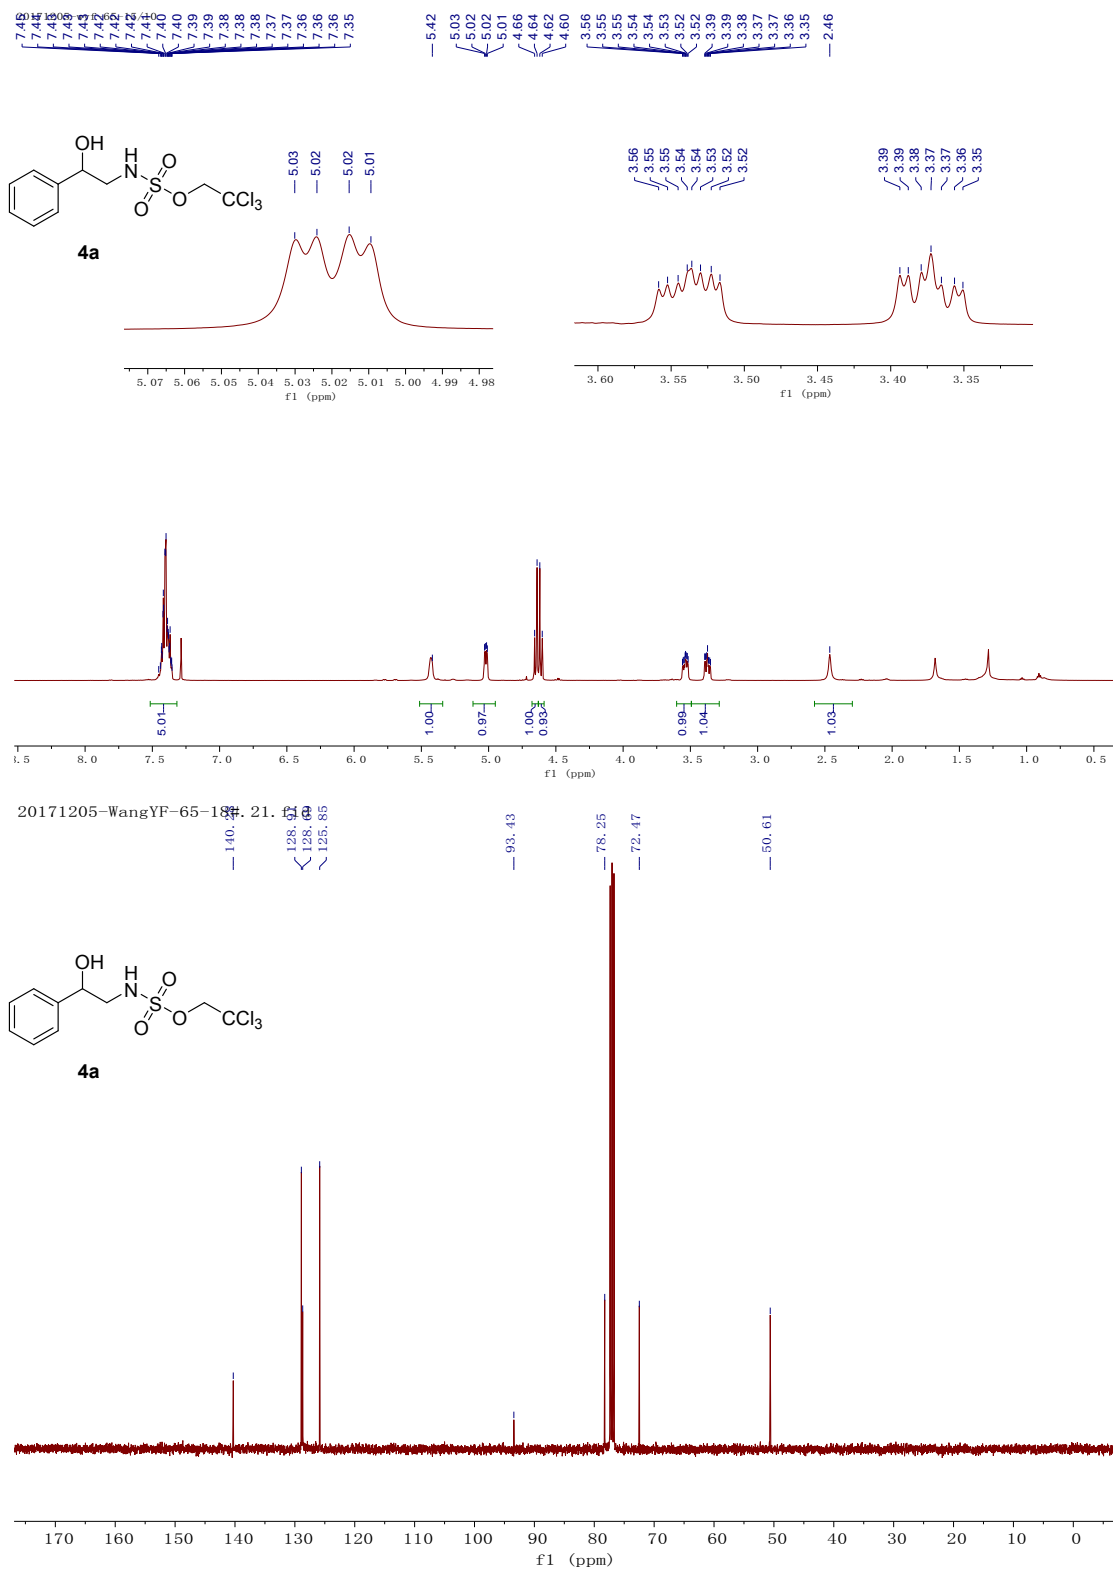

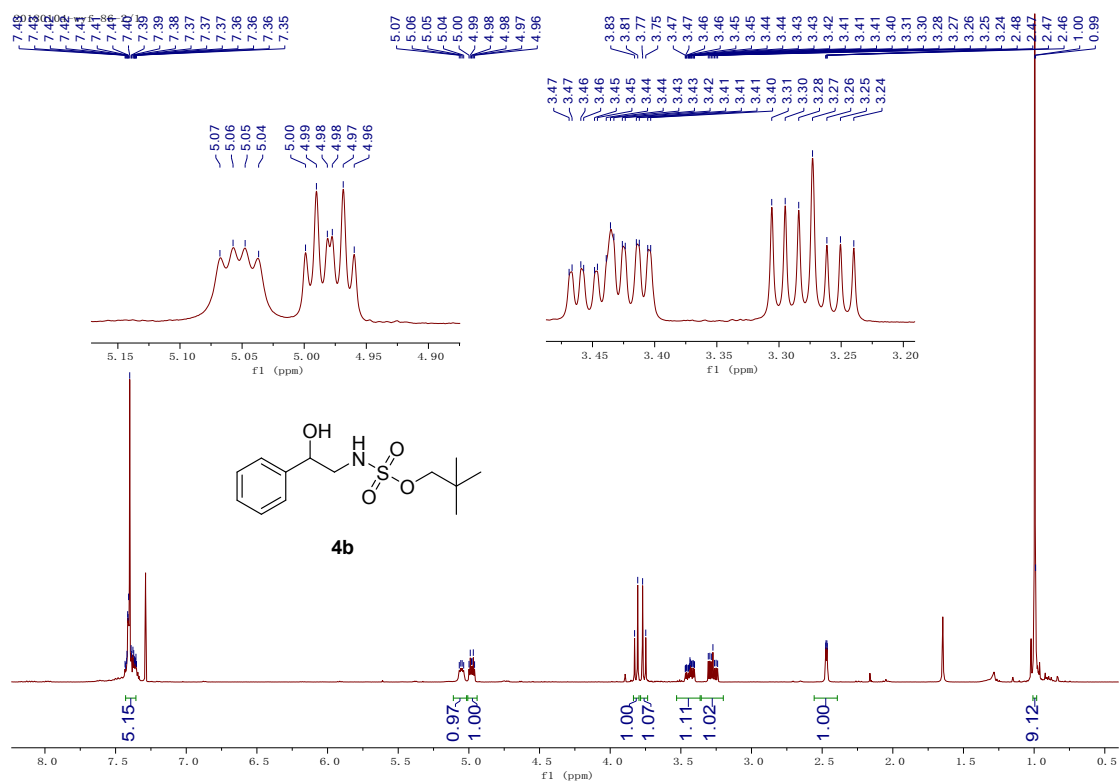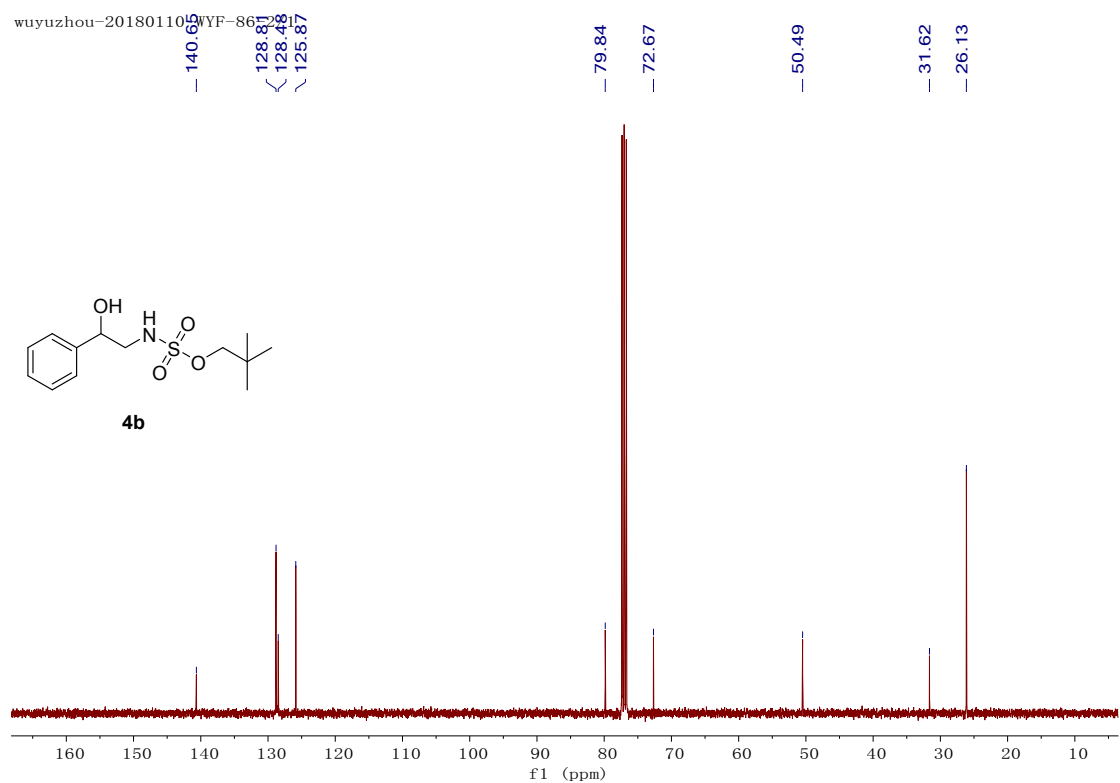

zhongfangrui-20170104-36161

7.50, 7.49, 7.48, 7.47, 7.46, 7.45, 7.44, 7.43, 7.42, 7.41, 7.40, 7.39, 7.38, 7.37, 7.36, 7.35, 5.50, 5.49, 5.48, 5.47, 5.00, 4.99, 4.98, 4.97, 4.96, 4.95, 4.94, 4.93, 4.92, 4.91, 4.90, 4.89, 4.88, 4.87, 4.86, 4.85, 4.84, 4.83, 4.82, 4.81, 4.80, 4.79, 4.78, 4.77, 4.76, 4.75, 4.74, 4.73, 4.72, 4.71, 4.70, 4.69, 4.68, 4.67, 4.66, 4.65, 4.64, 4.63, 4.62, 4.61, 4.60, 4.59, 4.58, 4.57, 4.56, 4.55, 4.54, 4.53, 4.52, 4.51, 4.50, 4.49, 4.48, 4.47, 4.46, 4.45, 4.44, 4.43, 4.42, 4.41, 4.40, 4.39, 4.38, 4.37, 4.36, 4.35, 4.34, 4.33, 4.32, 4.31, 4.30, 4.29, 4.28, 4.27, 4.26, 4.25, 4.24, 4.23, 4.22, 4.21, 4.20, 4.19, 4.18, 4.17, 4.16, 4.15, 4.14, 4.13, 4.12, 4.11, 4.10, 4.09, 4.08, 4.07, 4.06, 4.05, 4.04, 4.03, 4.02, 4.01, 4.00, 3.99, 3.98, 3.97, 3.96, 3.95, 3.94, 3.93, 3.92, 3.91, 3.90, 3.89, 3.88, 3.87, 3.86, 3.85, 3.84, 3.83, 3.82, 3.81, 3.80, 3.79, 3.78, 3.77, 3.76, 3.75, 3.74, 3.73, 3.72, 3.71, 3.70, 3.69, 3.68, 3.67, 3.66, 3.65, 3.64, 3.63, 3.62, 3.61, 3.60, 3.59, 3.58, 3.57, 3.56, 3.55, 3.54, 3.53, 3.52, 3.51, 3.50, 3.49, 3.48, 3.47, 3.46, 3.45, 3.44, 3.43, 3.42, 3.41, 3.40, 3.39, 3.38, 3.37, 3.36, 3.35, 3.34, 3.33, 3.32, 3.31, 3.30, 3.29, 3.28, 3.27, 3.26, 3.25, 3.24, 3.23, 3.22, 3.21, 3.20, 3.19, 3.18, 3.17, 3.16, 3.15, 3.14, 3.13, 3.12, 3.11, 3.10, 3.09, 3.08, 3.07, 3.06, 3.05, 3.04, 3.03, 3.02, 3.01, 3.00, 2.99, 2.98, 2.97, 2.96, 2.95, 2.94, 2.93, 2.92, 2.91, 2.90, 2.89, 2.88, 2.87, 2.86, 2.85, 2.84, 2.83, 2.82, 2.81, 2.80, 2.79, 2.78, 2.77, 2.76, 2.75, 2.74, 2.73, 2.72, 2.71, 2.70, 2.69, 2.68, 2.67, 2.66, 2.65, 2.64, 2.63, 2.62, 2.61, 2.60, 2.59, 2.58, 2.57, 2.56, 2.55

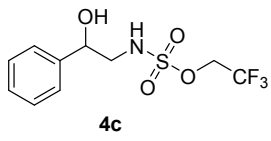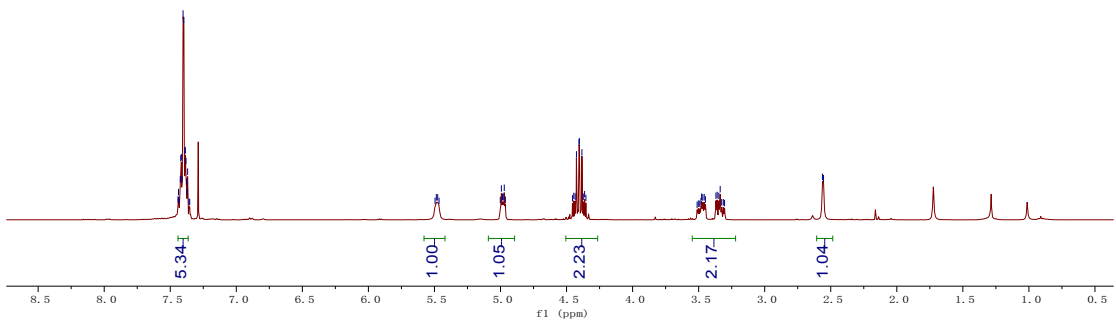

zhongfangrui-20170104-36161

140.0, 128.97, 128.74, 128.38, 126.28, 125.86, 123.47, 120.72, 118.05, 72.54, 65.68, 65.30, 64.93, 64.55, 50.47

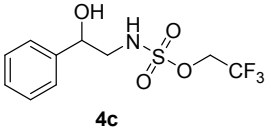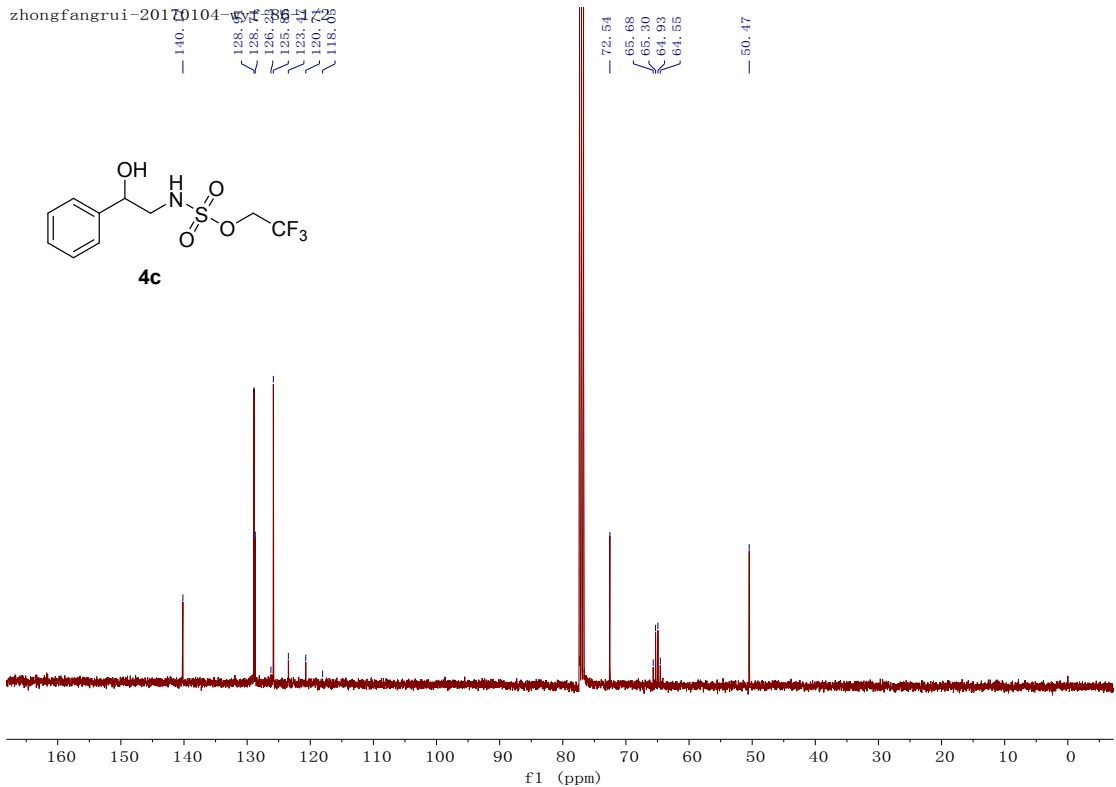

zhongfang  
syf-361p

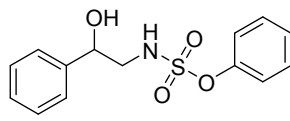

4d

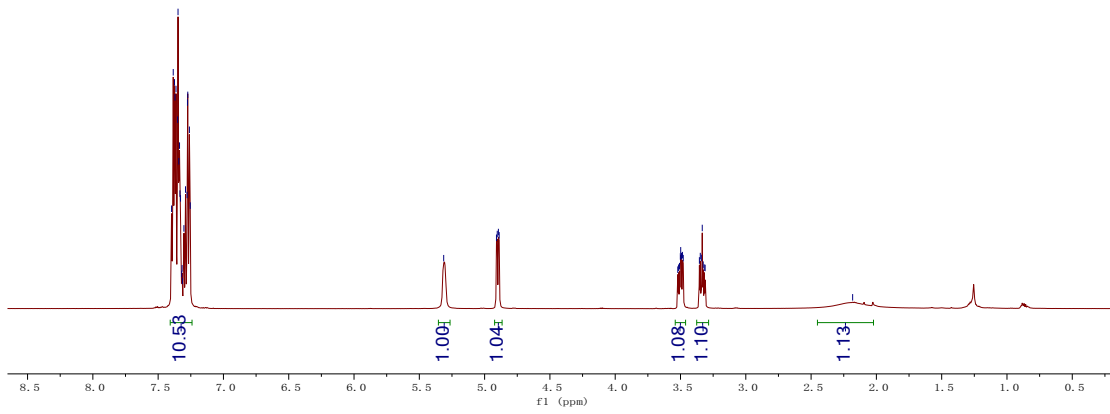

wyf-86-3/1  
WYF-86-3

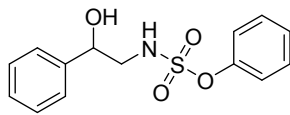

4d

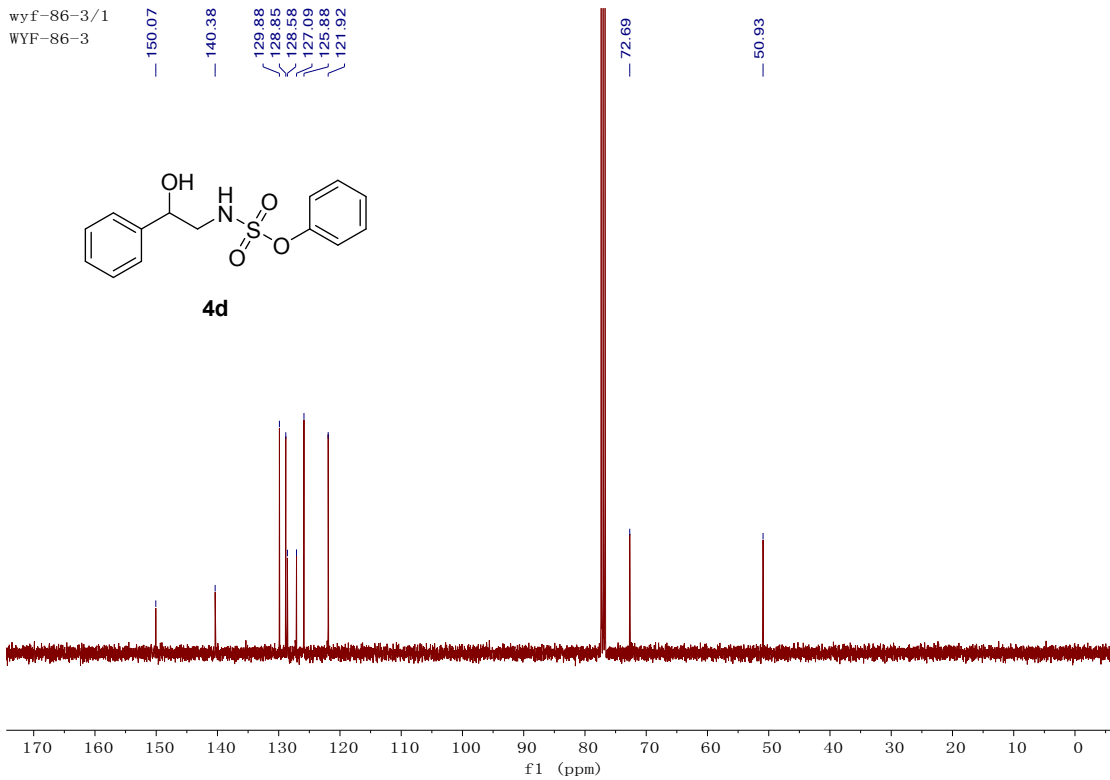

zhongfangrui 2019102-3-366p/10  
syf-366p

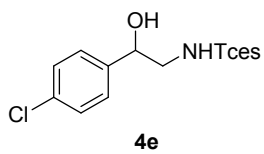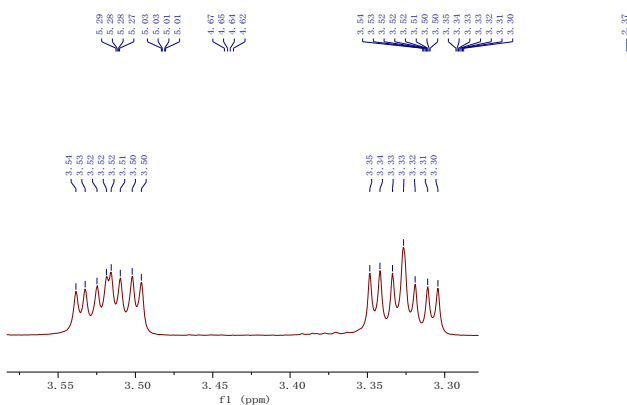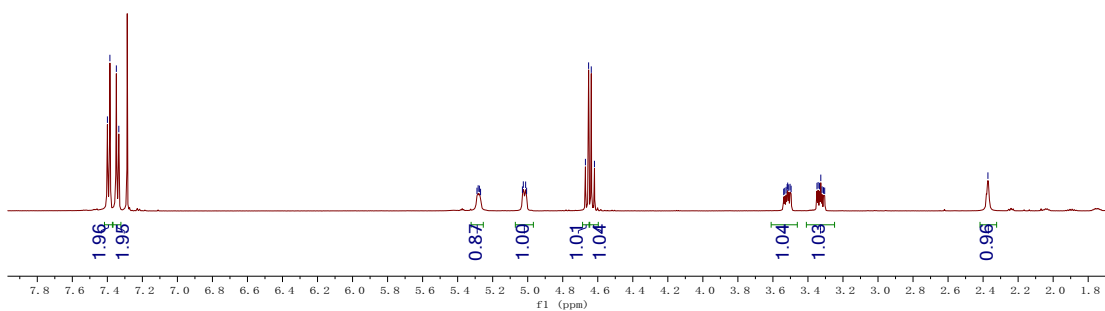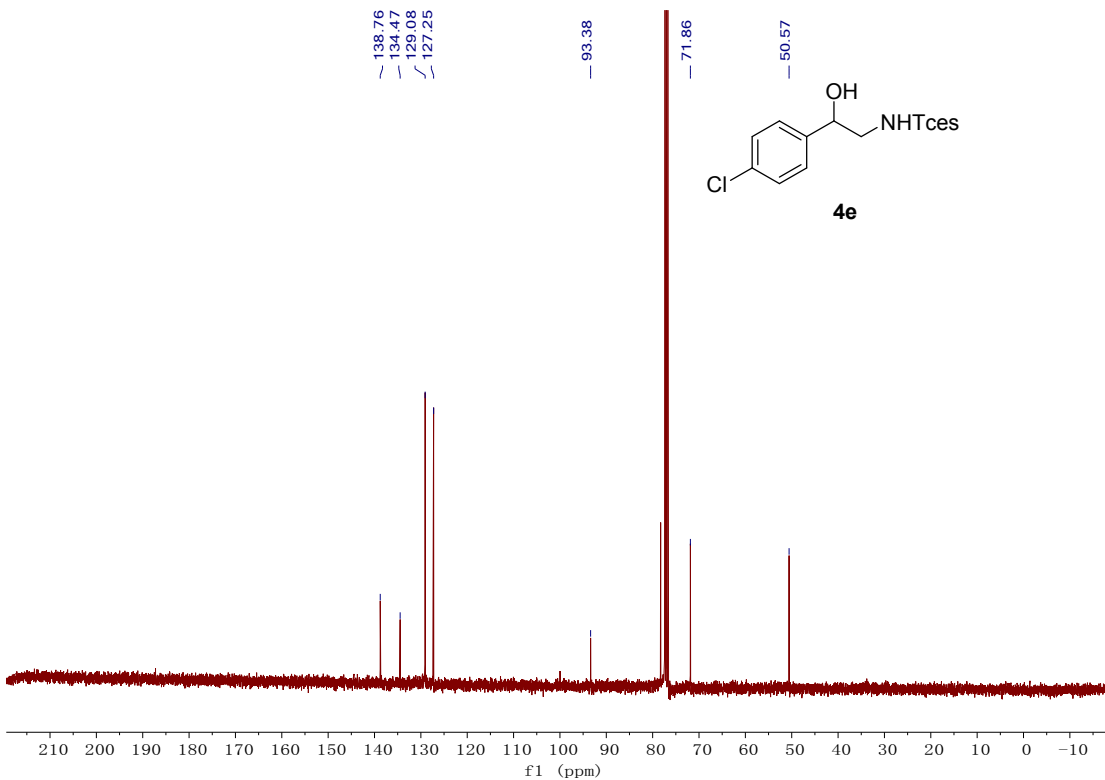



zhongguo yaoxue 20181229-2-363/1  
syf-363

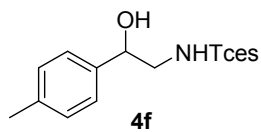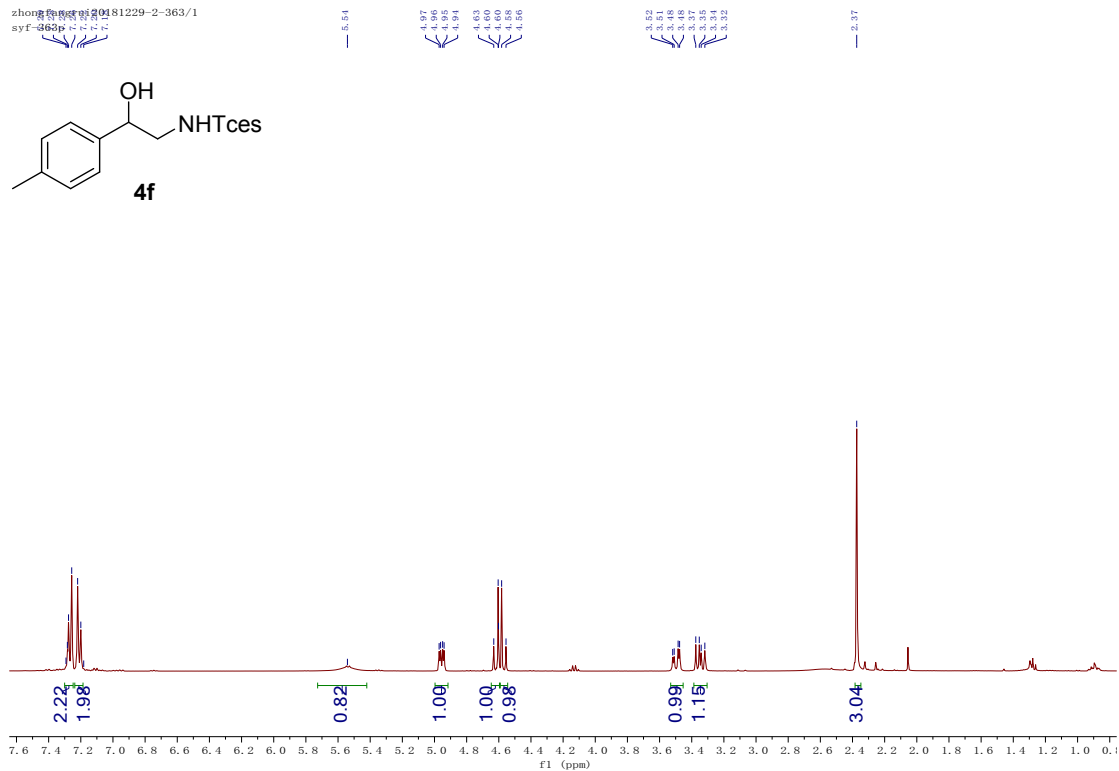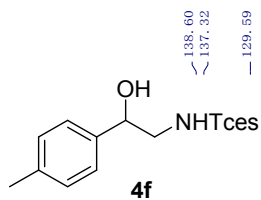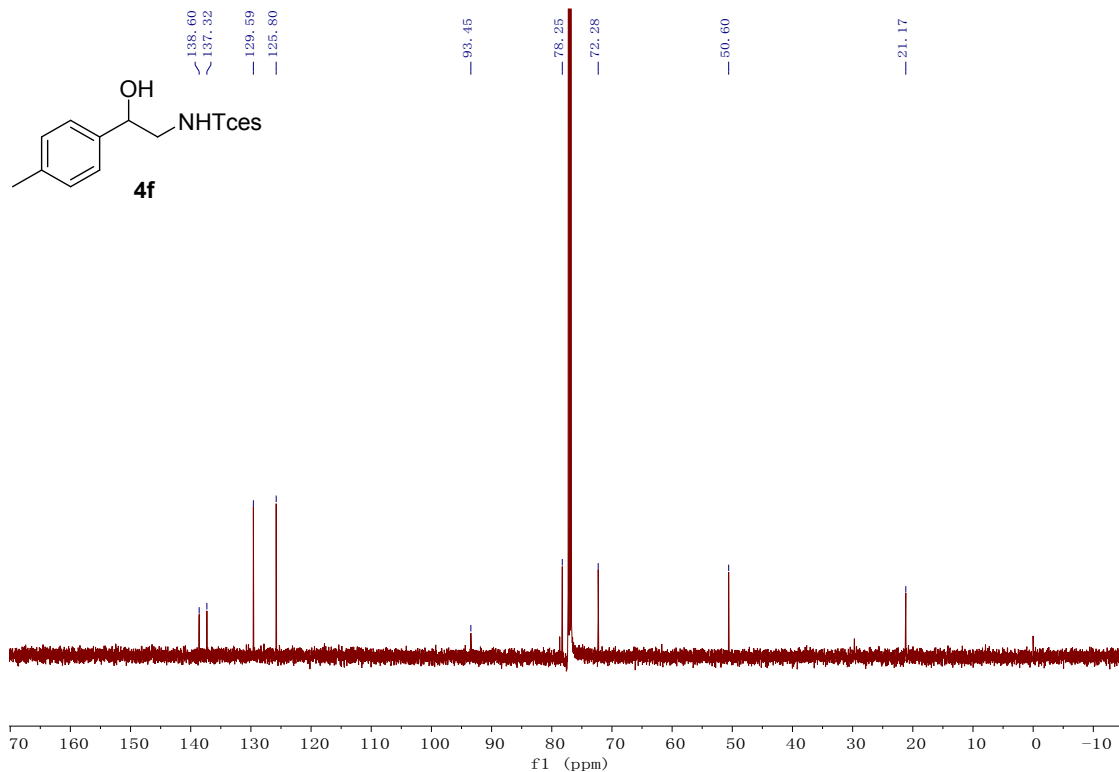

zhongfangrui-20180307-16/1  
 7.72, 7.71, 7.70, 7.69, 7.68, 7.67, 7.66, 7.65, 7.64, 7.63, 7.62, 7.61, 7.60, 7.59, 7.58, 7.57, 7.56, 7.55, 7.54, 7.53, 7.52, 7.51, 7.50, 7.49, 7.48, 7.47, 7.46, 7.45, 7.44, 7.43, 7.42, 7.41, 7.40, 7.39, 7.38, 7.37, 7.36, 7.35, 7.34, 7.33, 7.32, 7.31, 7.30, 7.29, 7.28, 7.27, 7.26, 7.25, 7.24, 7.23, 7.22, 7.21, 7.20, 7.19, 7.18, 7.17, 7.16, 7.15, 7.14, 7.13, 7.12, 7.11, 7.10, 7.09, 7.08, 7.07, 7.06, 7.05, 7.04, 7.03, 7.02, 7.01, 7.00, 5.46, 5.06, 5.05, 5.03, 5.02, 4.68, 4.64, 4.61, 3.56, 3.55, 3.53, 3.52, 3.36, 3.34, 3.33, 3.31, -2.62

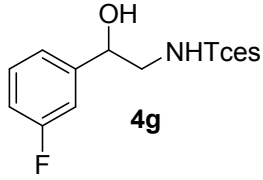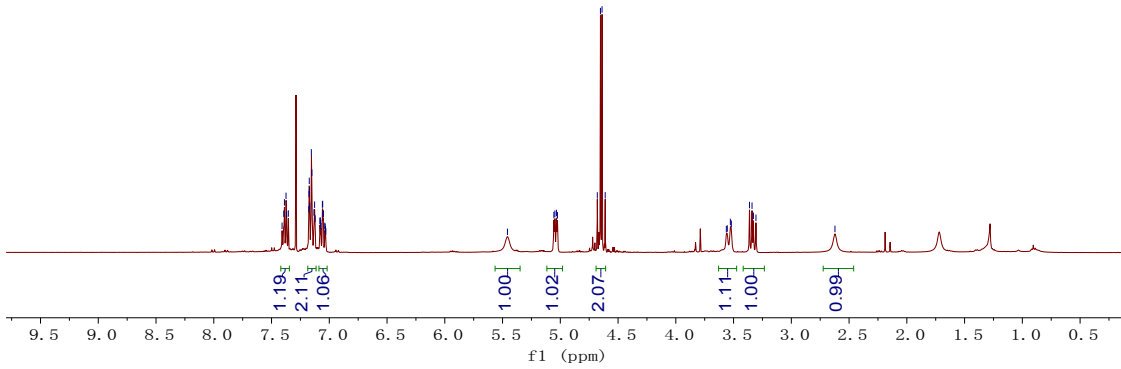

zhongfangrui-20180309-6#88  
 164.28, 161.88, 142.89, 142.89, 130.57, 130.49, 121.47, 121.44, 115.65, 115.44, 113.02, 112.80, 93.38, 78.28, 71.91, 71.89, 50.54

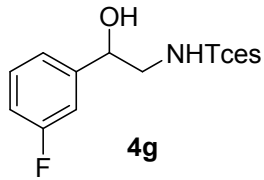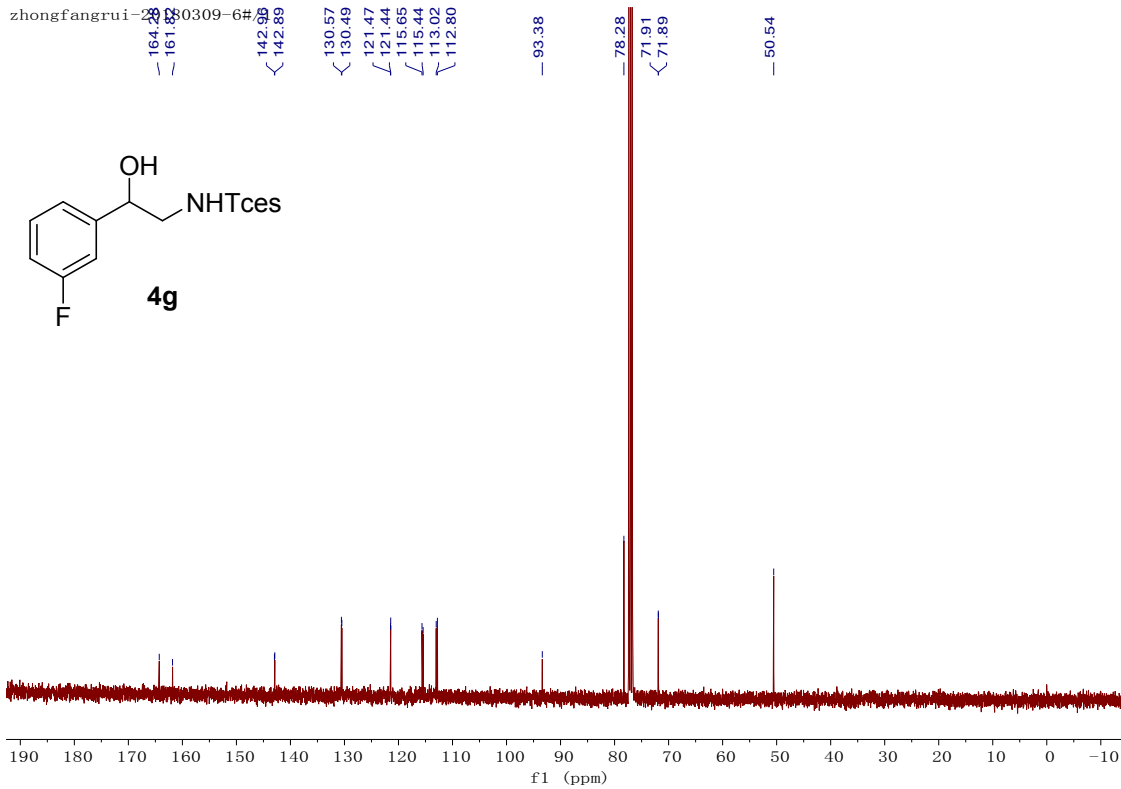

201-528-201-5p#. 21. fid  
 SYF-238F

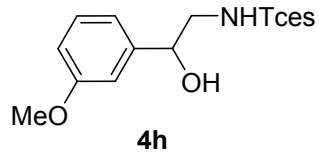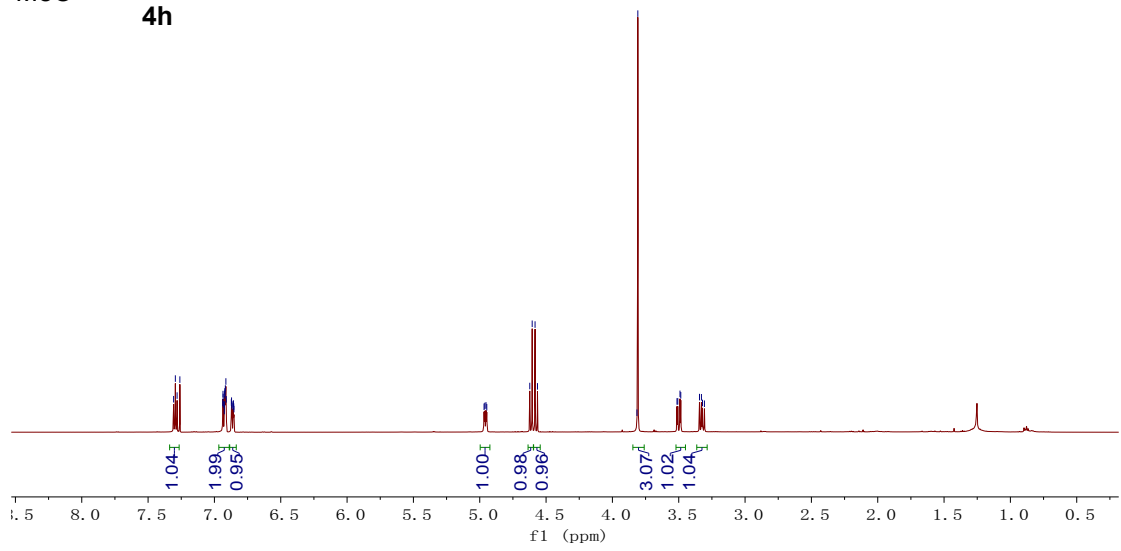

20180628-ShiYF-201-5p#. 21. fid

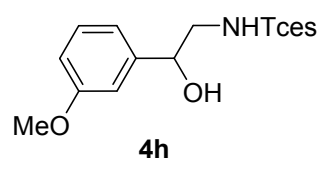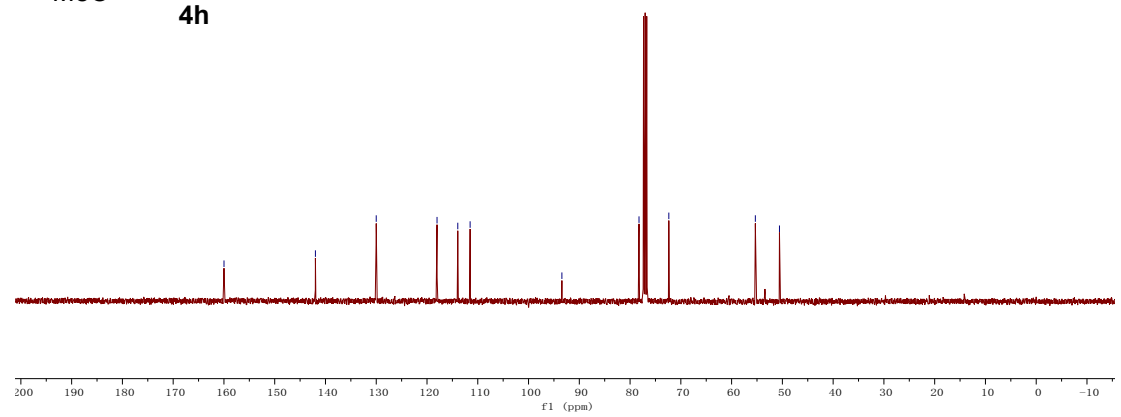

zhongfangrui-20180319-wyF-364-1  
syf-364-1

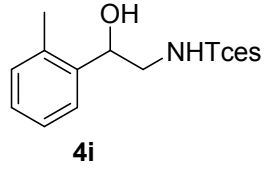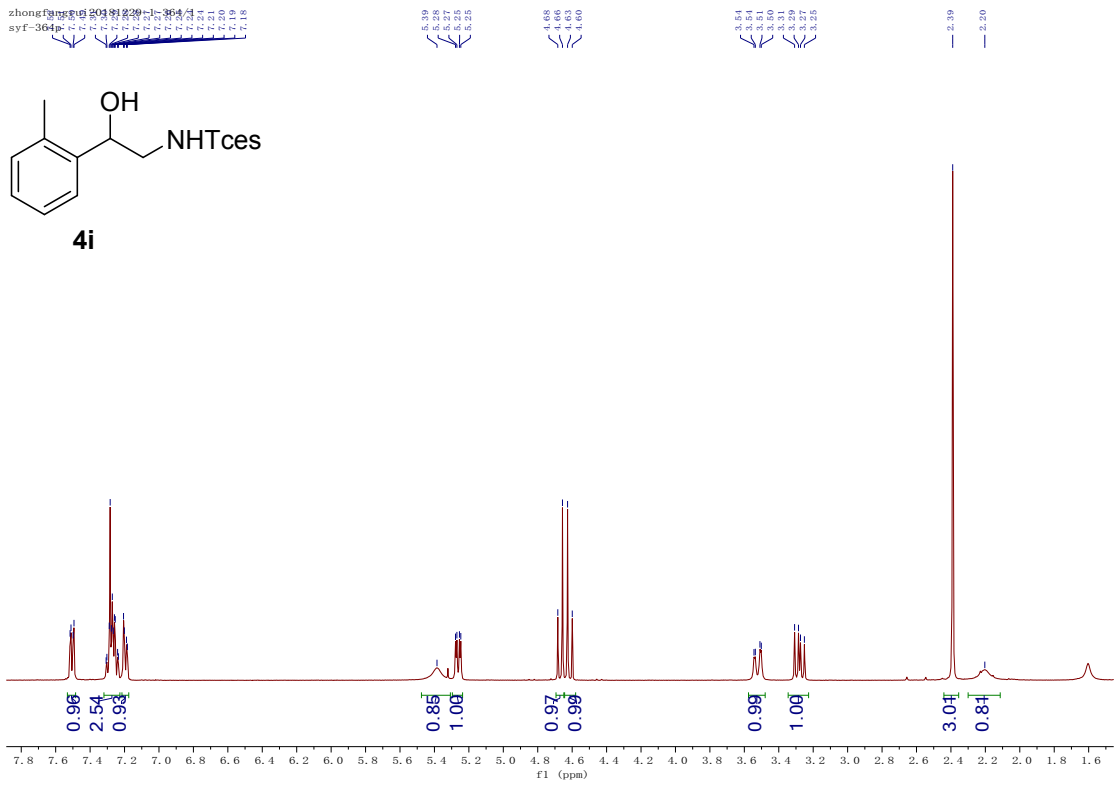

zhongfangrui-20180319-wyF-98-6/1

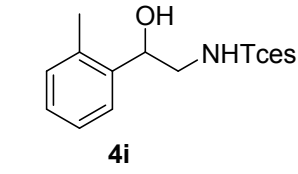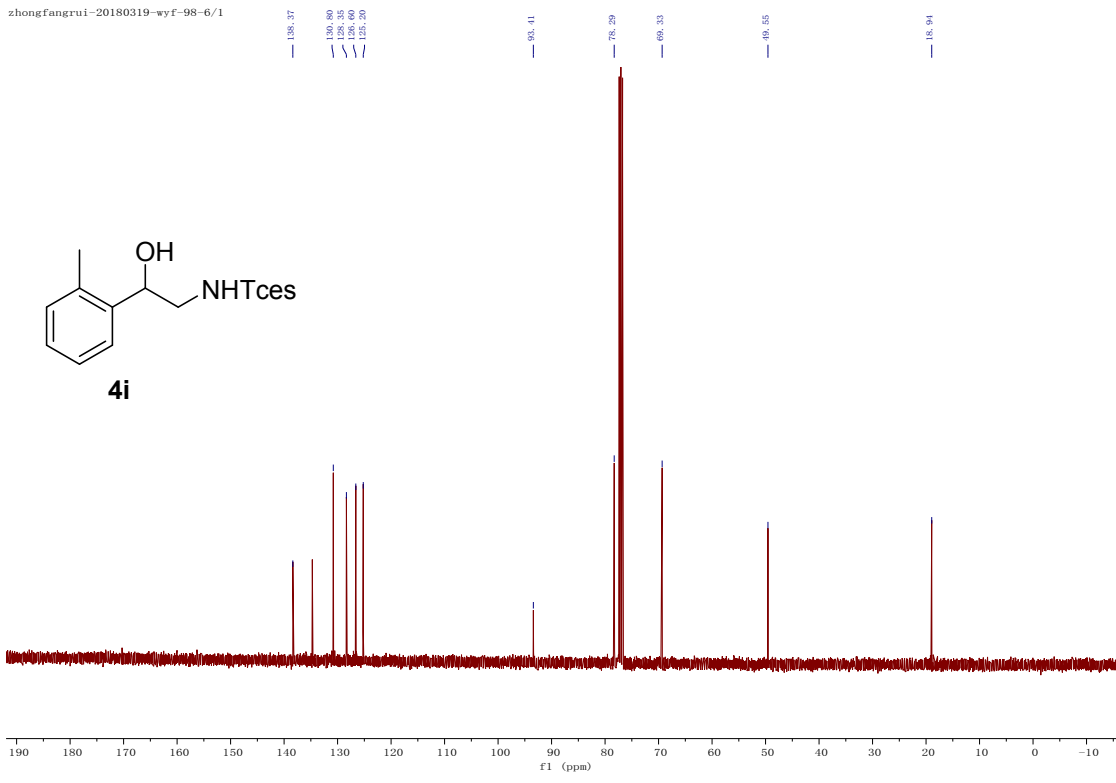

zhongfangrui-20180326-wyf-98-8/1

4.47  
4.47  
4.46  
4.45  
4.43  
4.40

4.07  
4.07  
4.00  
4.58

3.72  
3.71  
3.70  
3.69  
3.68  
3.66  
3.35  
3.34  
3.31  
3.30  
3.29  
3.28

2.05  
2.01

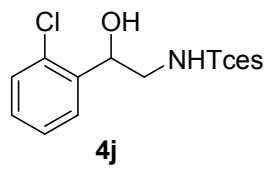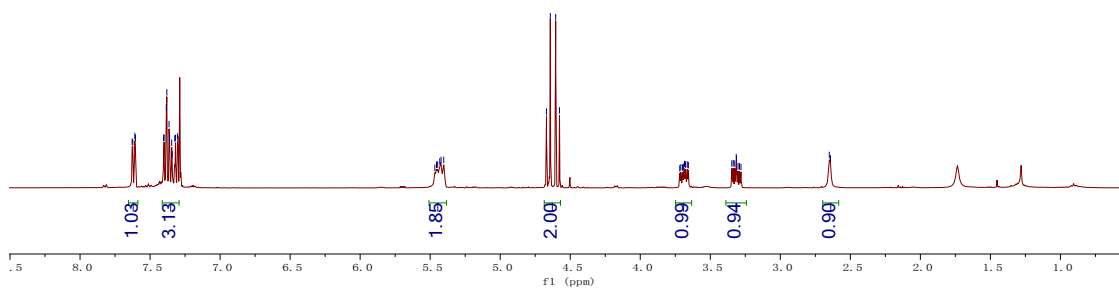

zhongfangrui-20180327-wyf-98-8/1

137.64  
136.84  
133.75  
128.60  
127.27

69.35

78.35

69.26

68.77

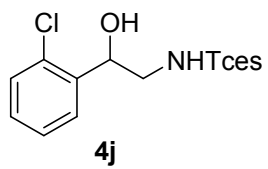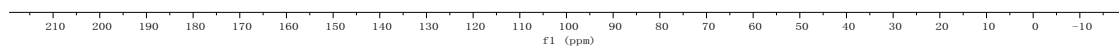

zhongfangrui-20180307-wyF-87-12/2  
syf-367

4.82  
4.81  
4.80  
4.79  
4.78  
4.77

4.65  
4.63  
4.61

3.61  
3.60  
3.59  
3.58  
3.57  
3.56  
3.55  
3.54

2.95

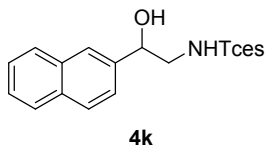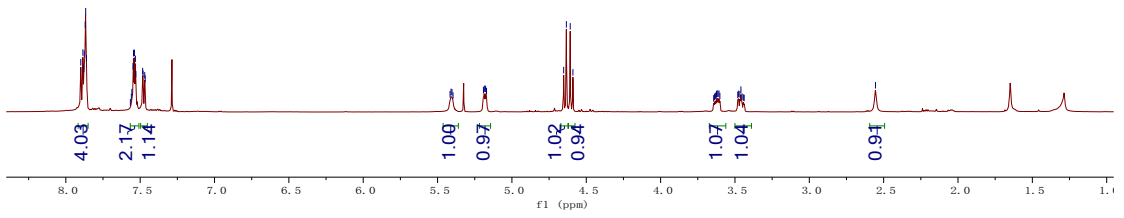

zhongfangrui-20180307-wyF-87-12/2

137.60  
133.34  
133.16  
128.79  
128.01  
127.80  
126.52  
126.04  
123.36

95.40

78.26  
72.58

50.57

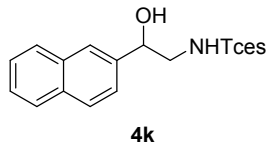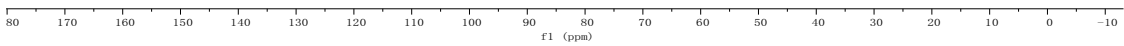

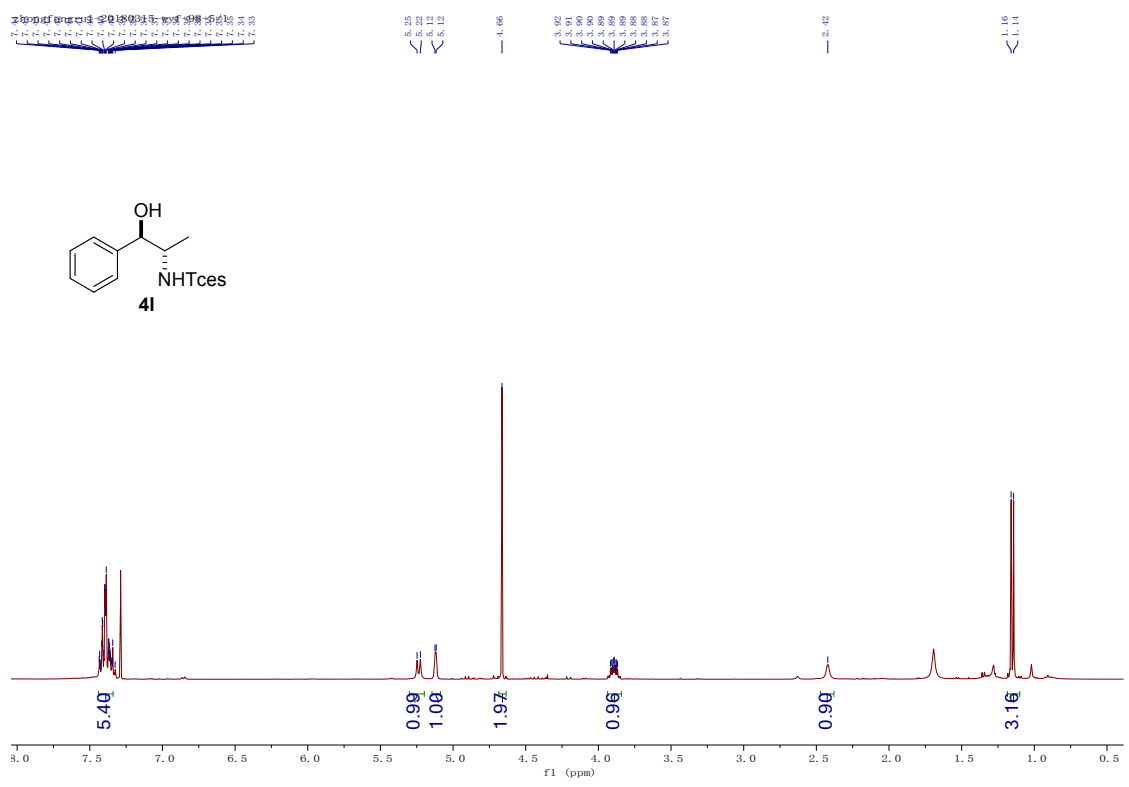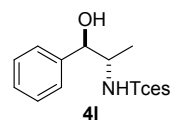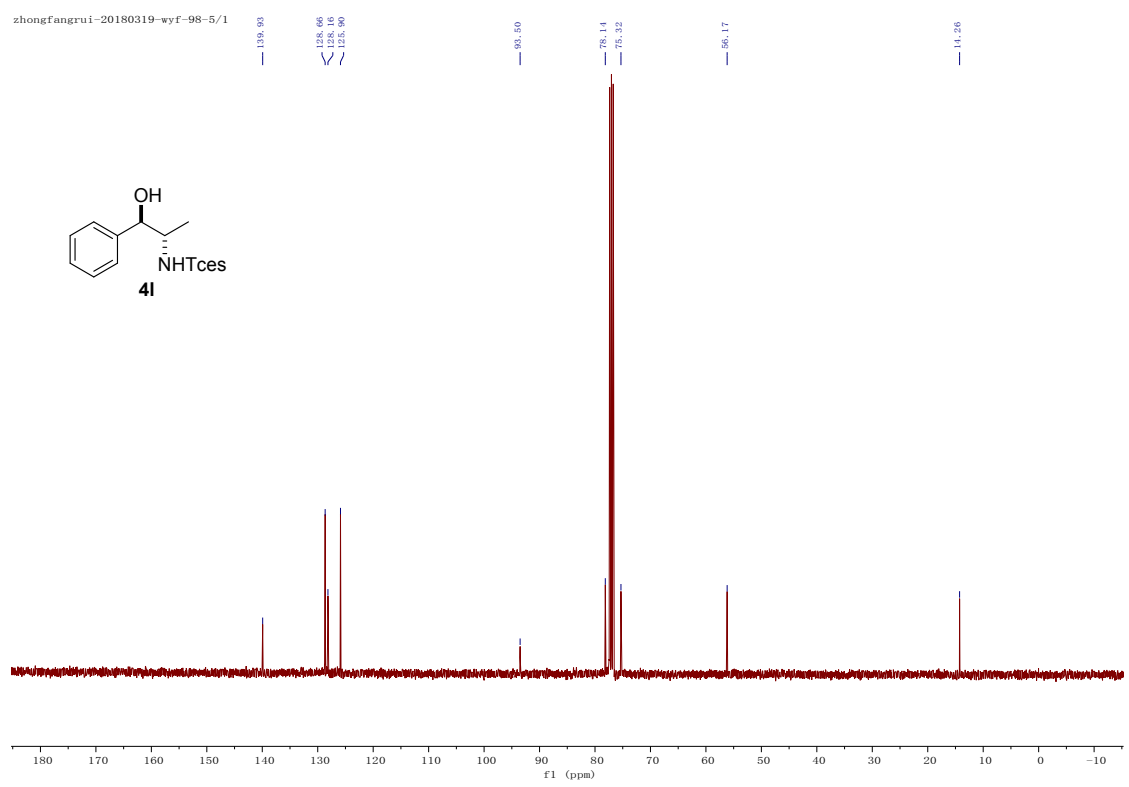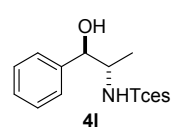

20180525-ShiYF-181#3-3  
7.74, 7.73, 7.72, 7.71, 7.70, 7.69, 7.68, 7.67, 7.66, 7.65, 7.64, 7.63, 7.62, 7.61, 7.60, 7.59, 7.58, 7.57, 7.56, 7.55, 7.54, 7.53, 7.52, 7.51, 7.50, 7.49, 7.48, 7.47, 7.46, 7.45, 7.44, 7.43, 7.42, 7.41, 7.40, 7.39, 7.38, 7.37, 7.36, 7.35, 7.34, 7.33, 7.32, 7.31, 7.30, 7.29, 7.28

4.76

3.71, 3.69, 3.58, 3.56, 3.43, 3.41, 3.39, 3.38, 3.36, 3.35, 3.33

2.39, 2.37

1.63

0.93

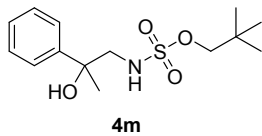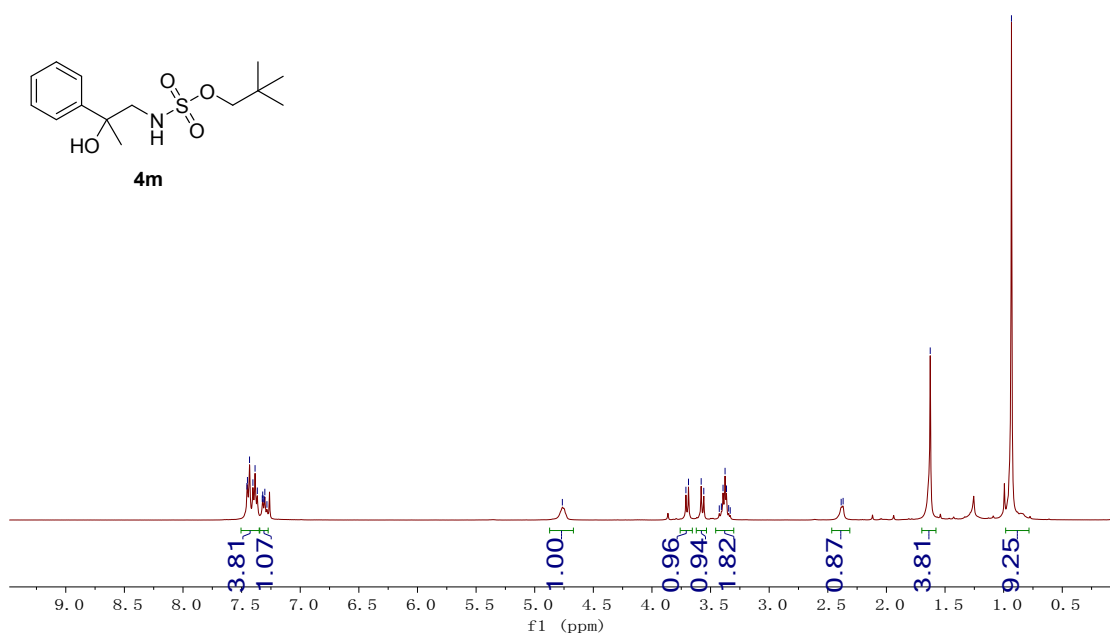

181C/10  
syf-181-3

144.57

128.67

127.60

124.84

79.74

73.79

54.24

31.58

27.58

26.09

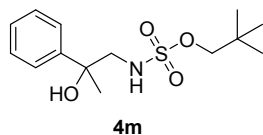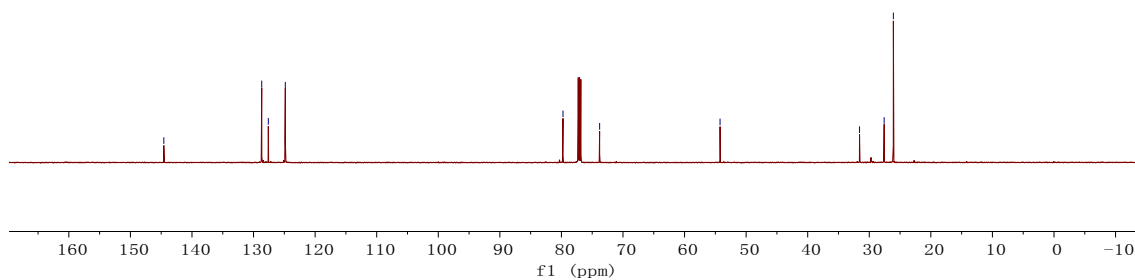



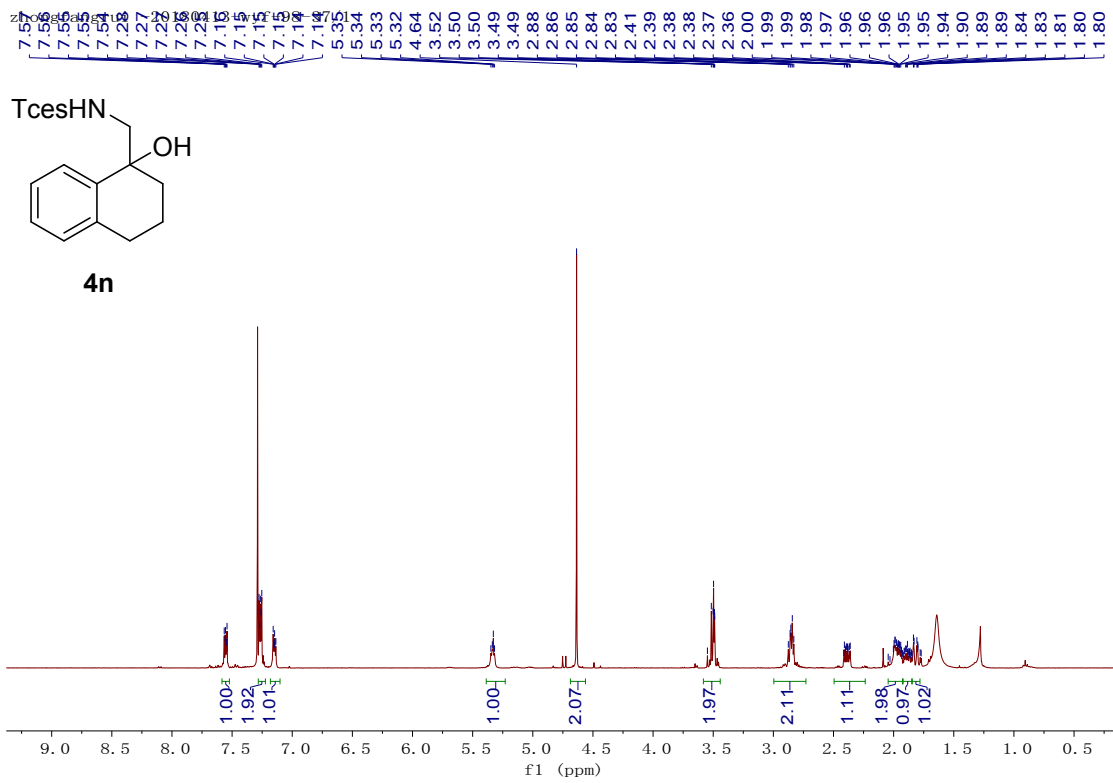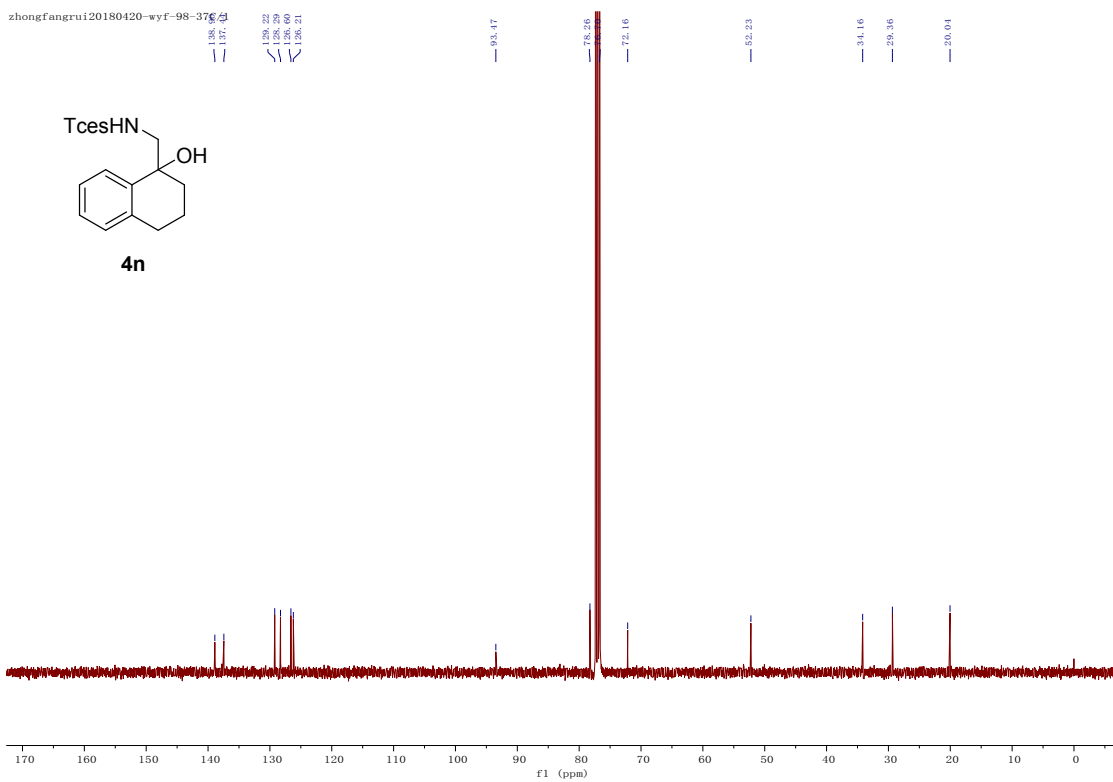

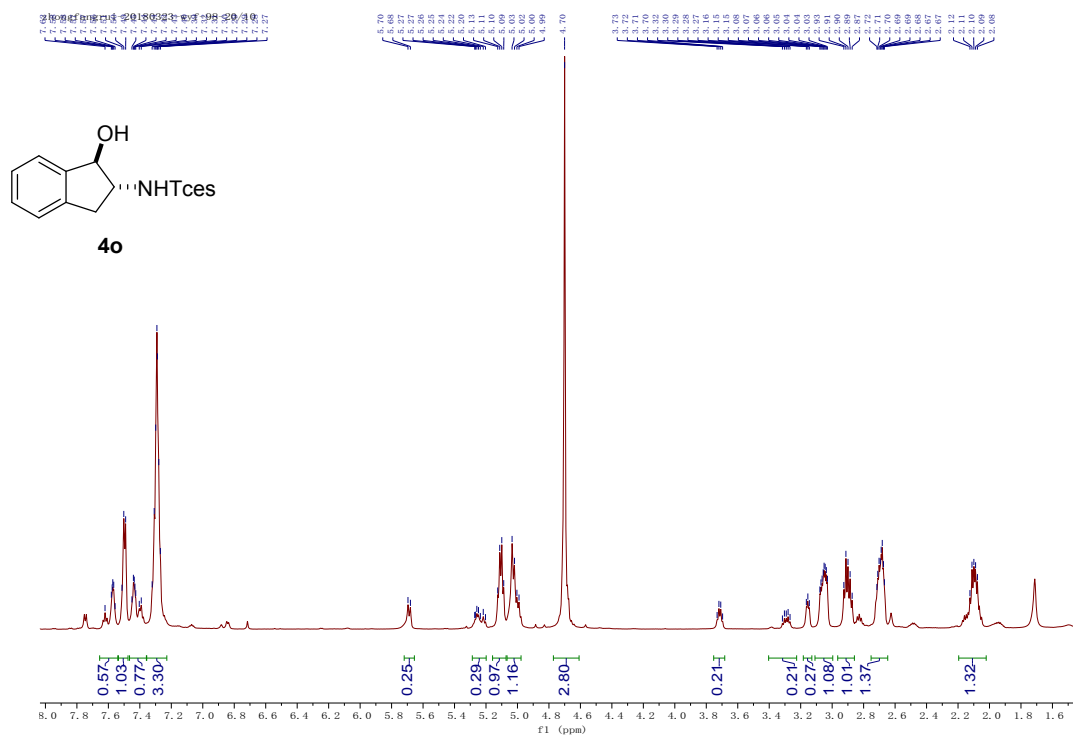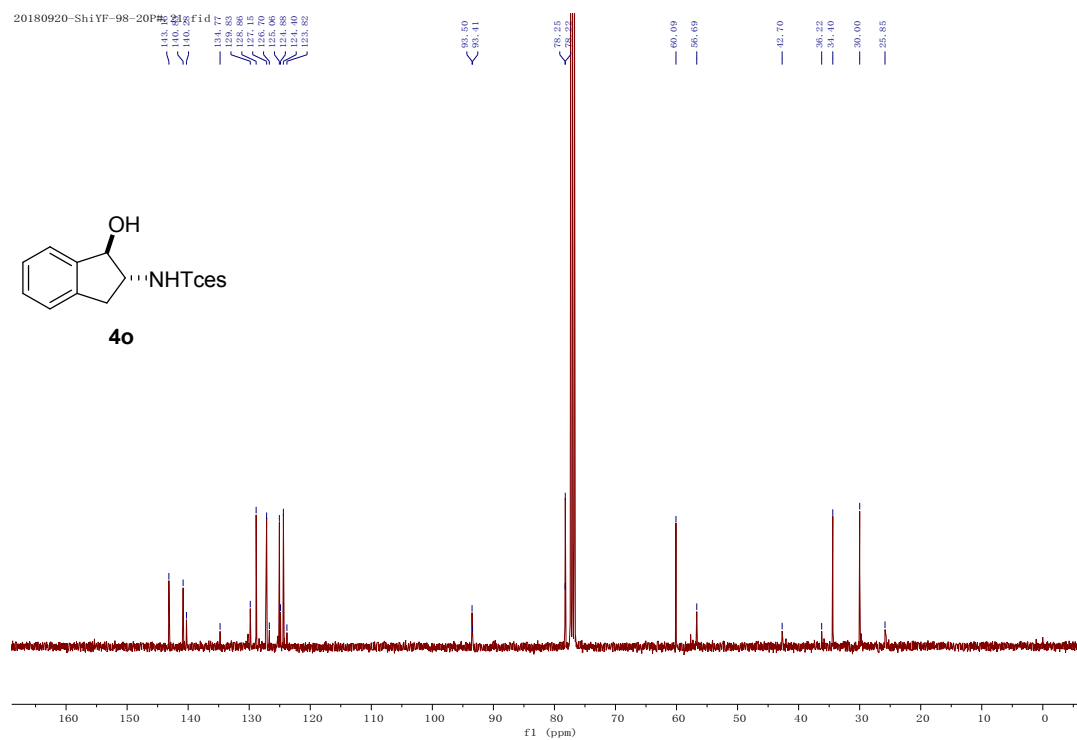

zhongfangrui-20180408-wyf-98-33/1

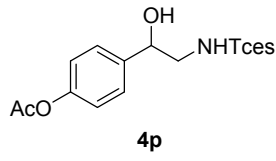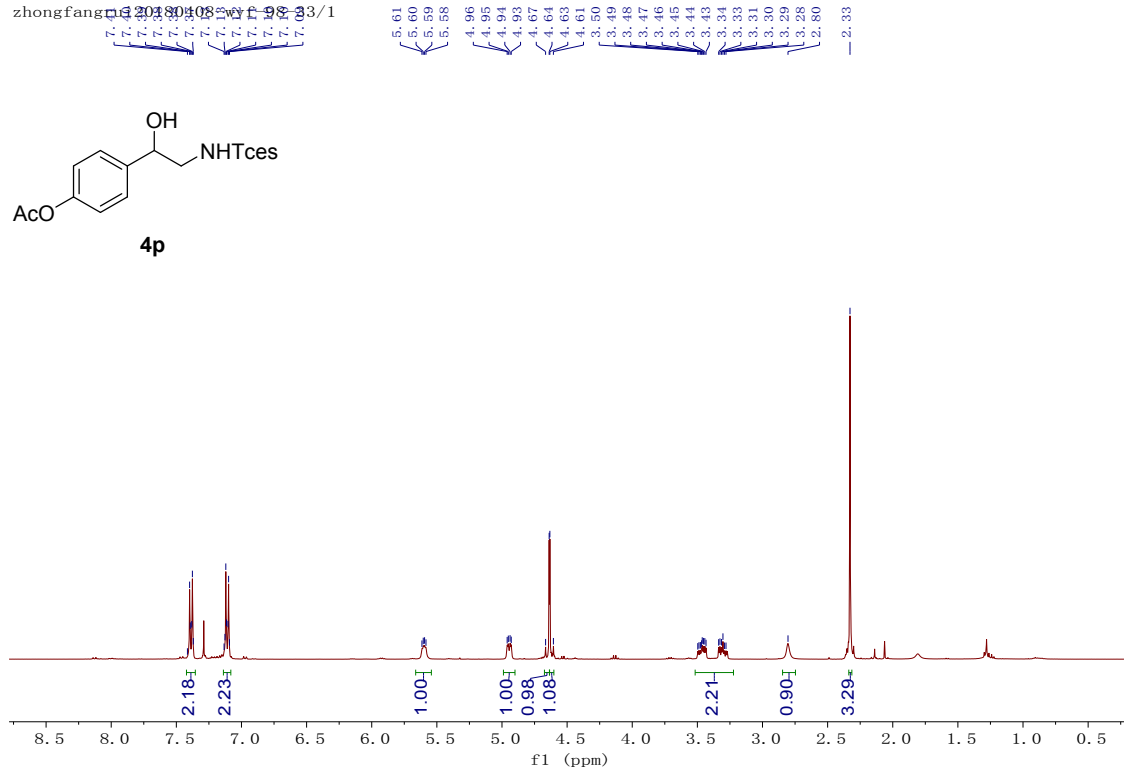

zhongfangrui-20180413-wyf-98-33C/4

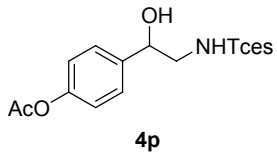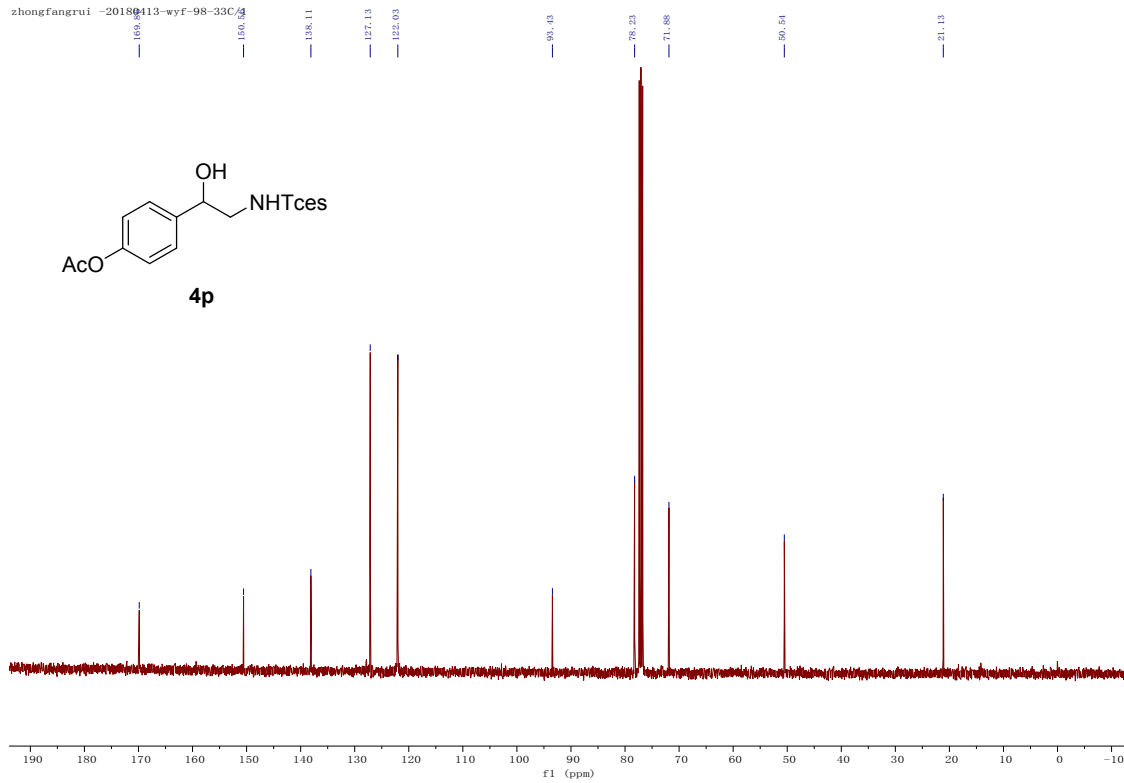

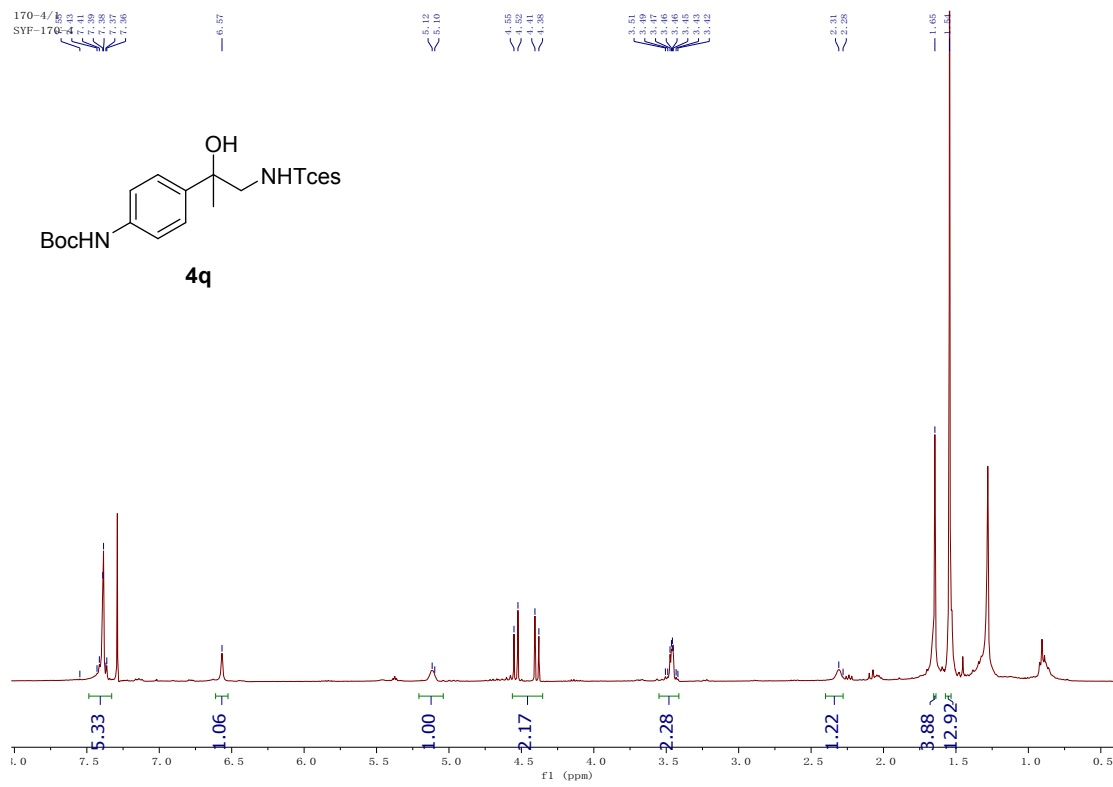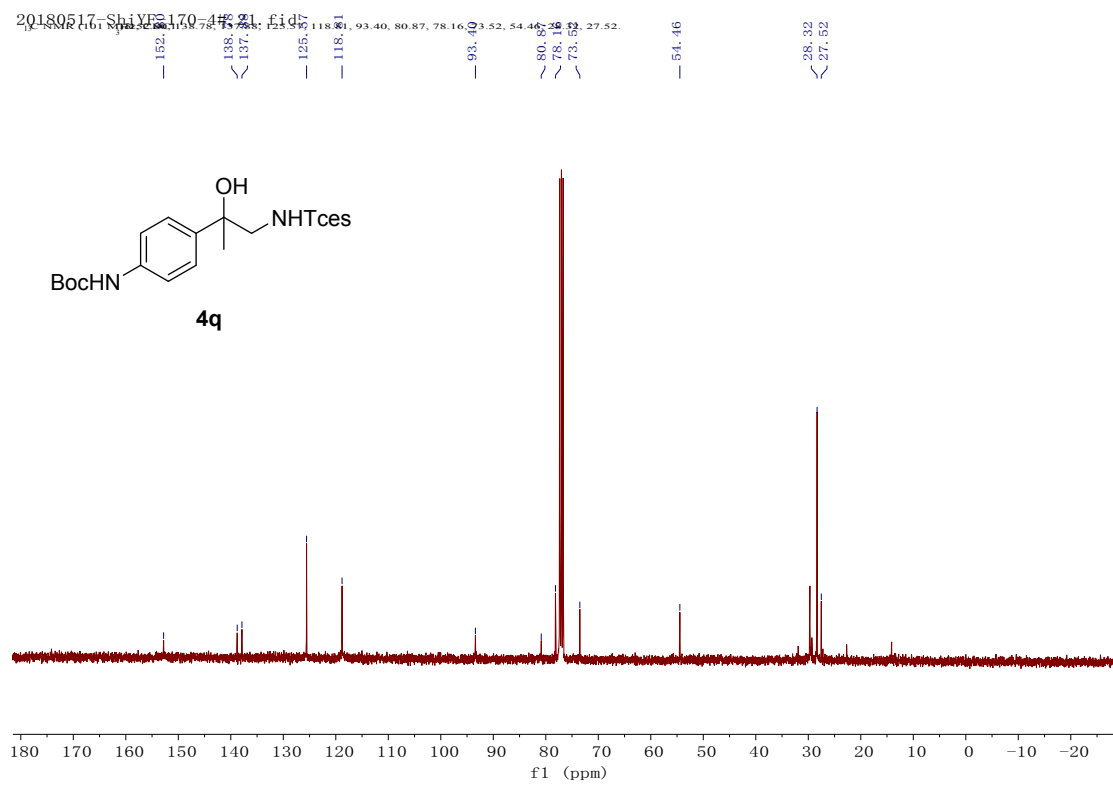

zhongfangrui-20180412

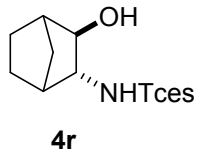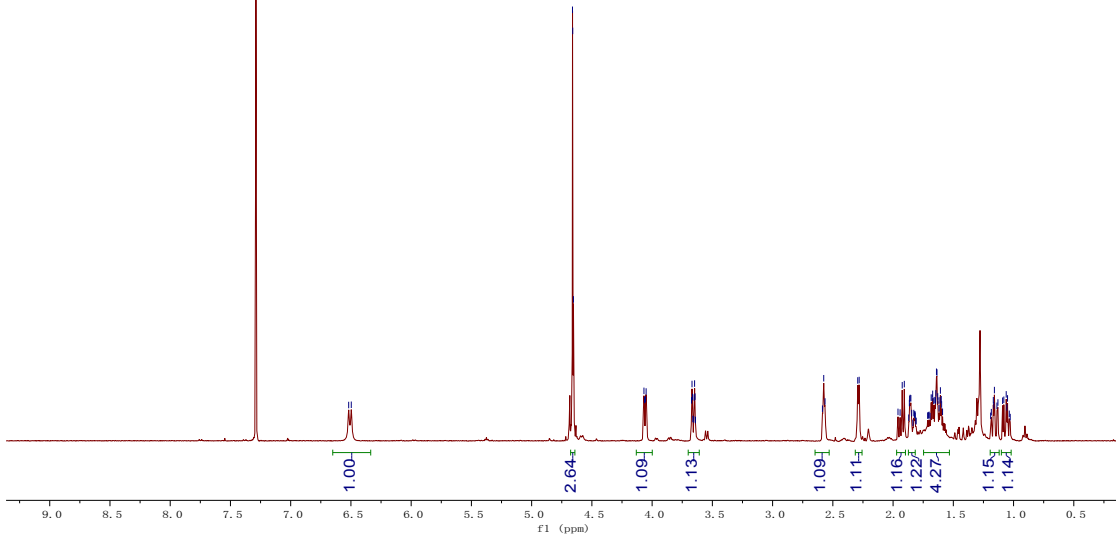

20180502-WangYF-105-1#. 21. fid

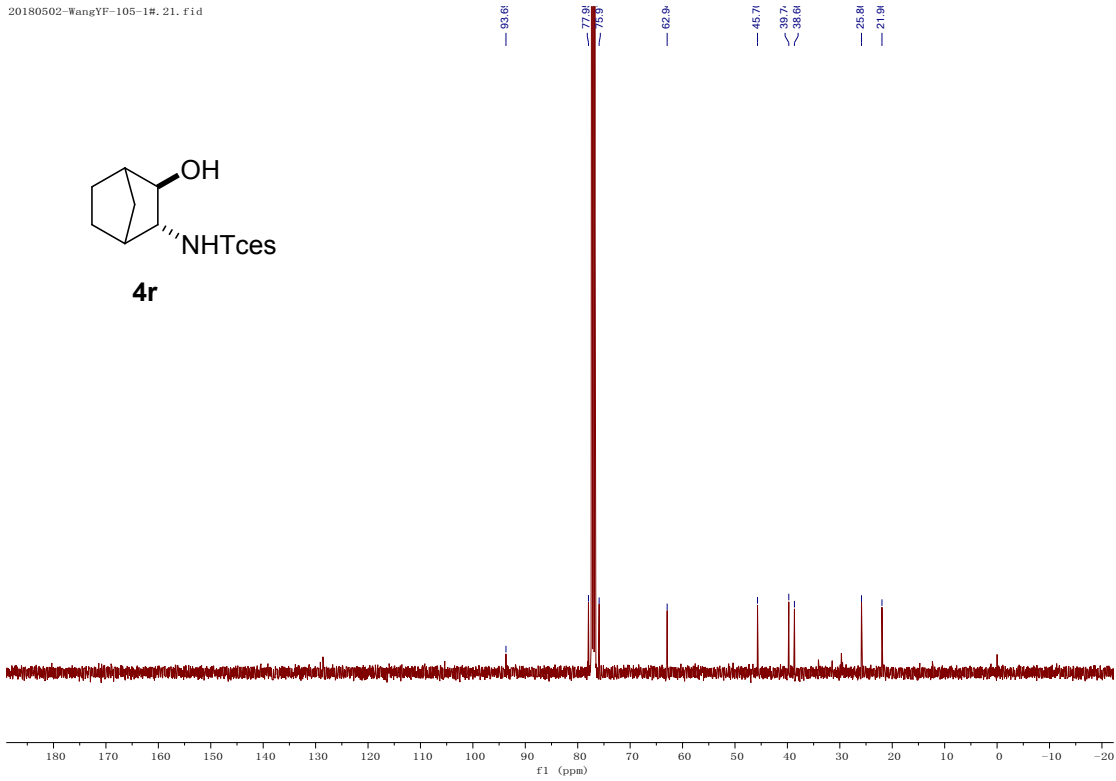

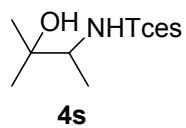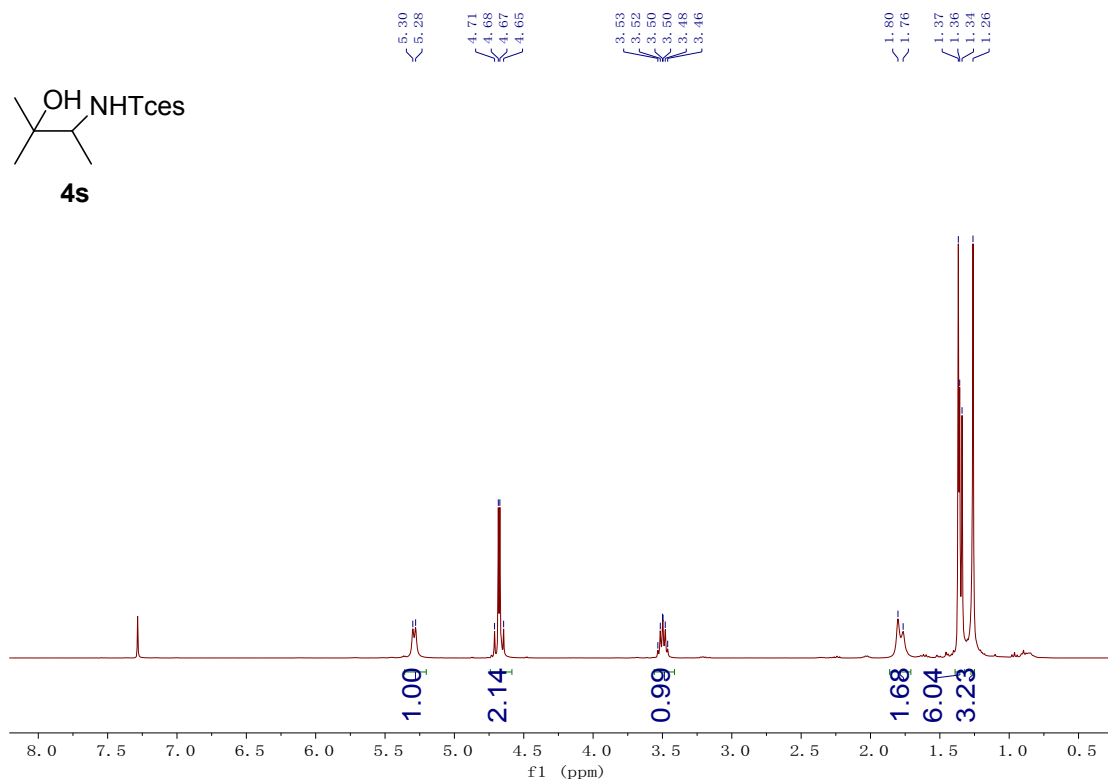

189-3/11  
syf-189-3

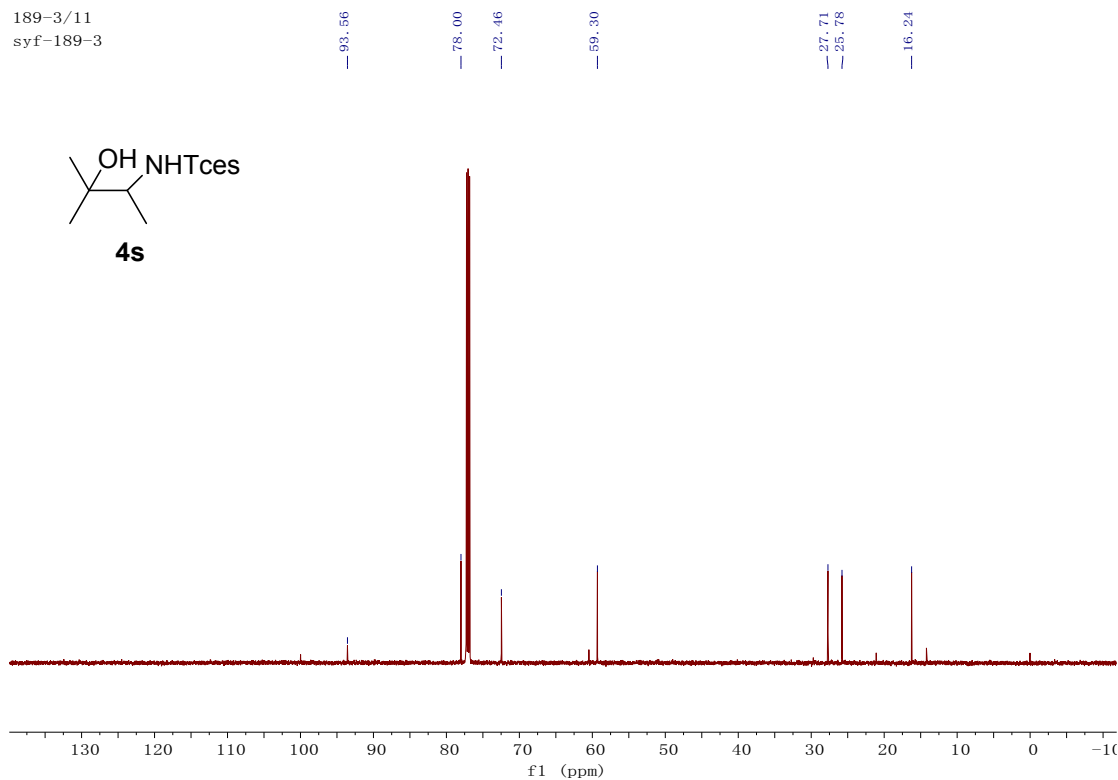

20180528-ShiYF-189-7#. 11. fid

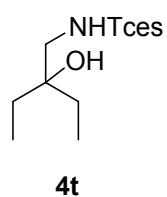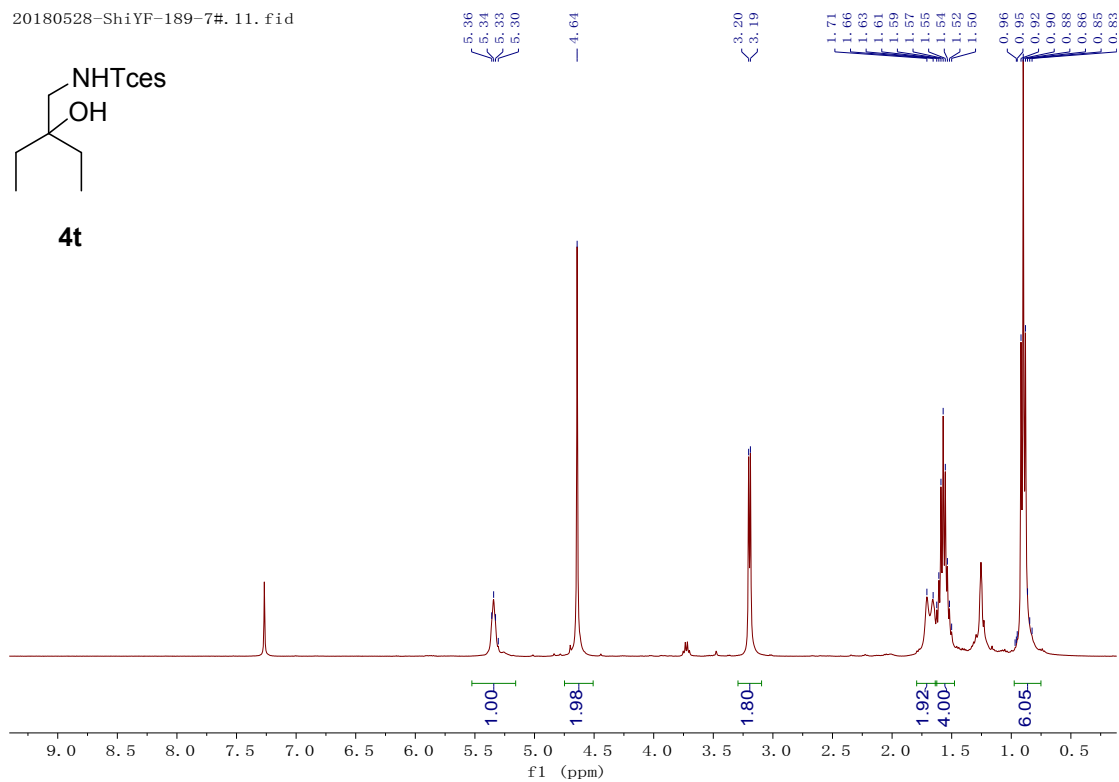

20180528-ShiYF-189-7#. 21. fid

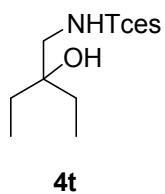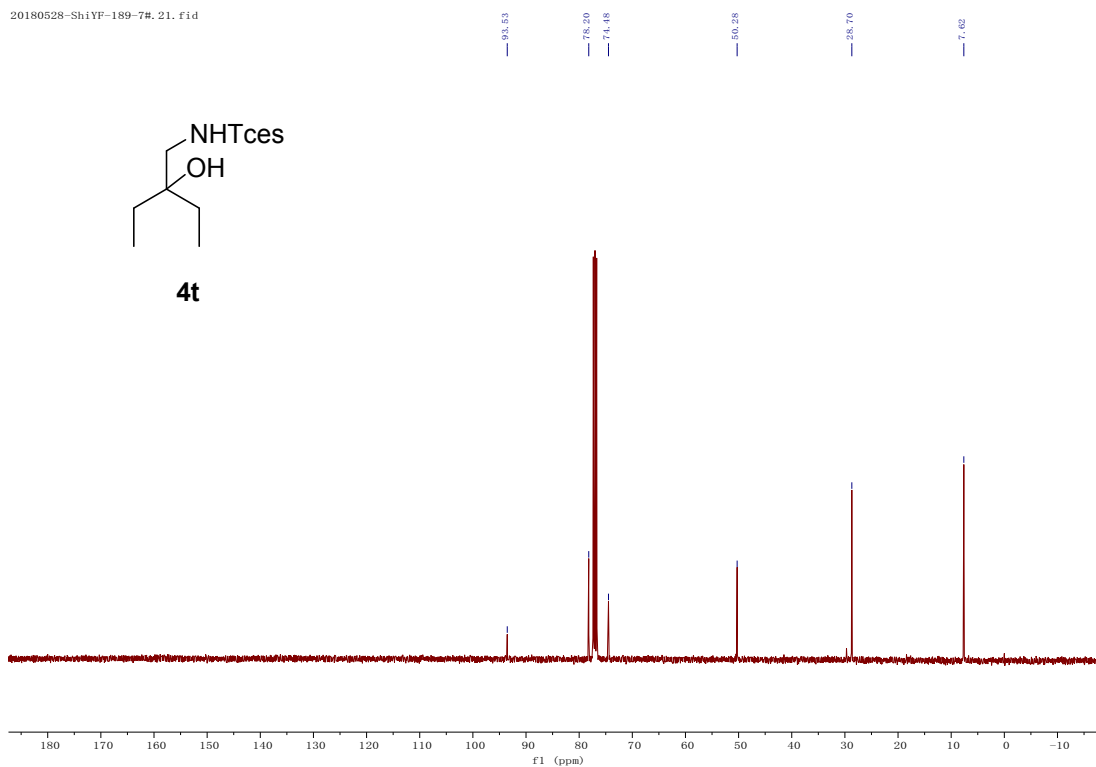

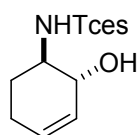

**4u**

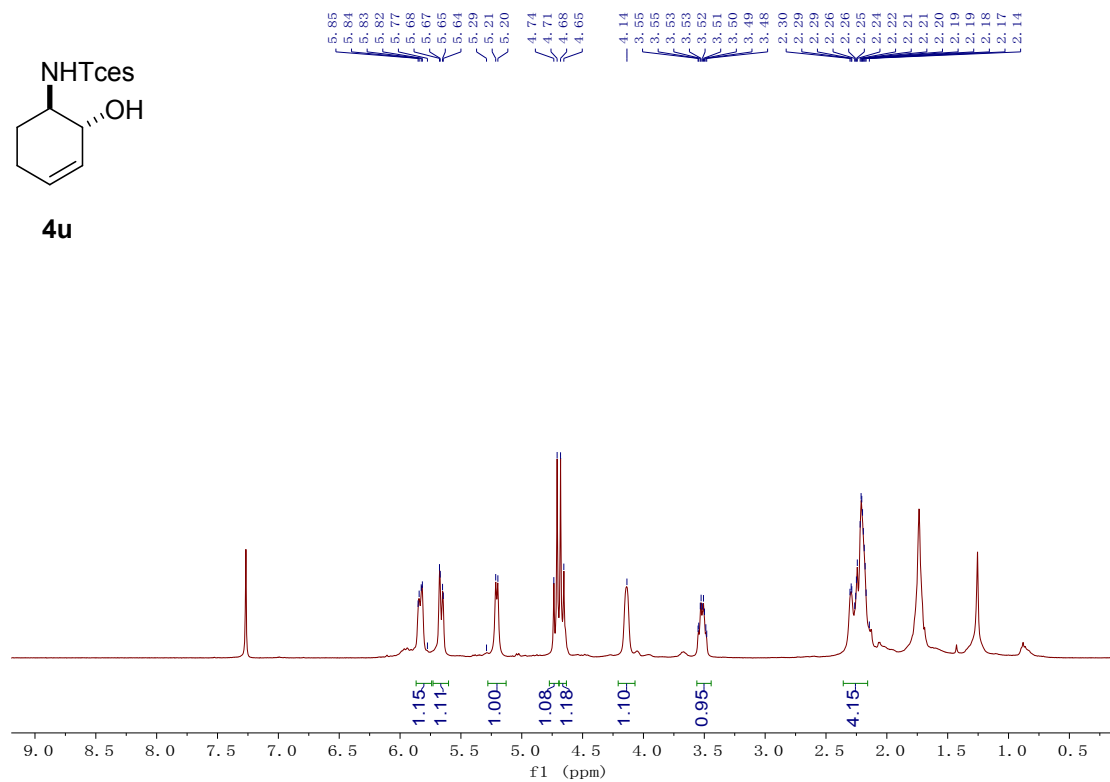

20180525-ShiYF-189-6R\_21.fid

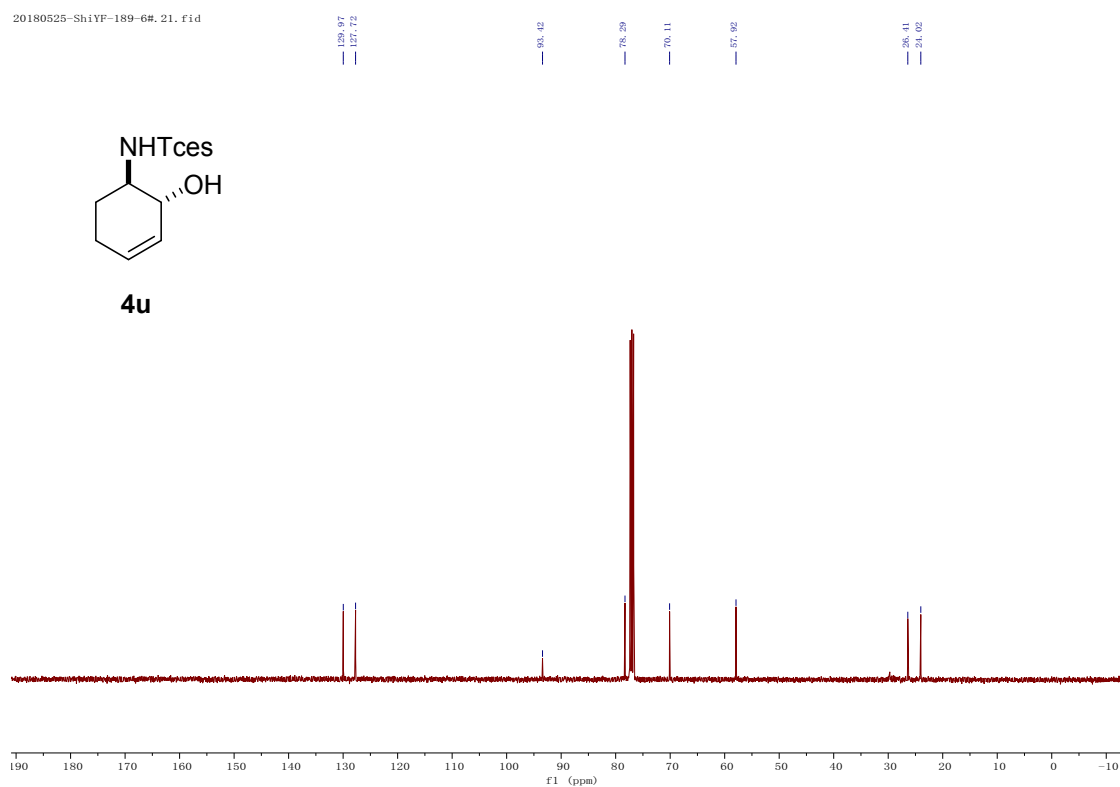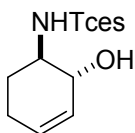

**4u**



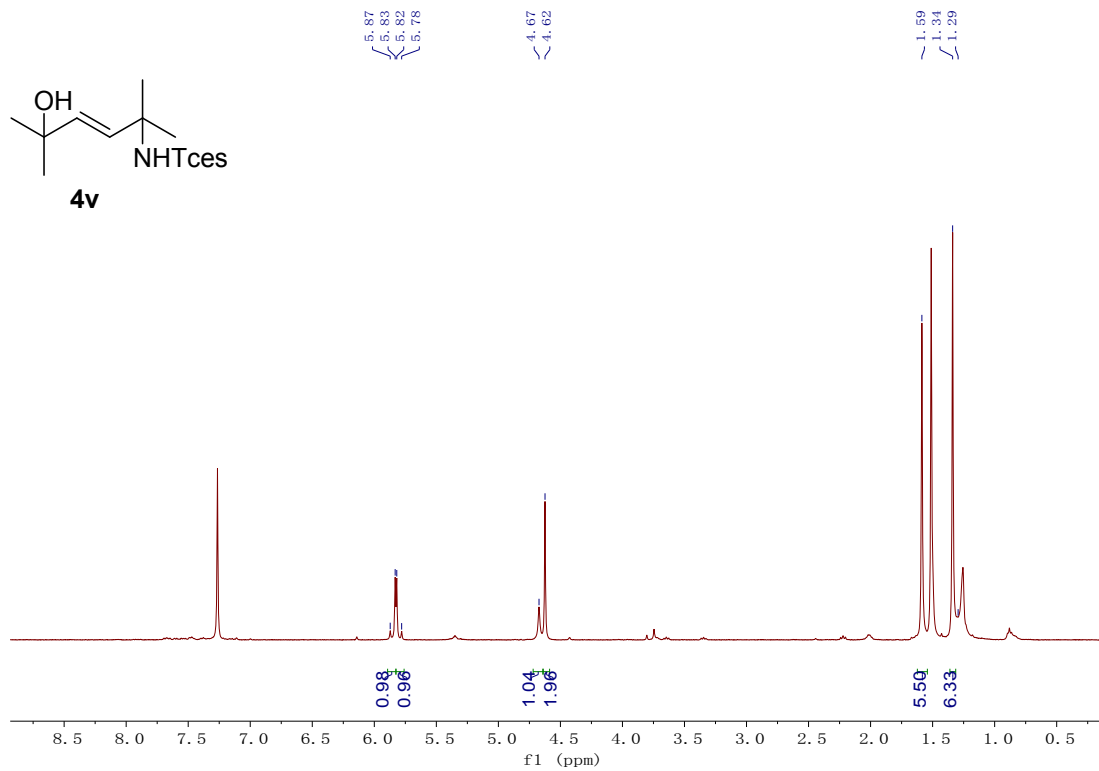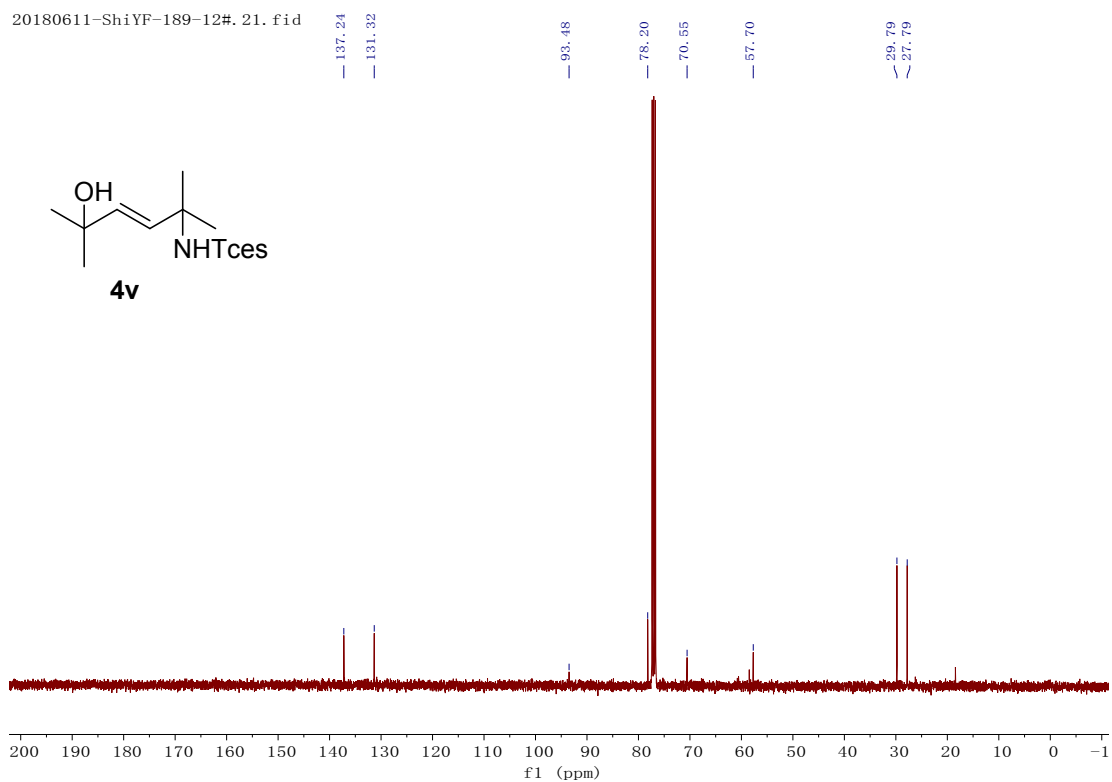

20180731-ShiYF-242P#.11.fid

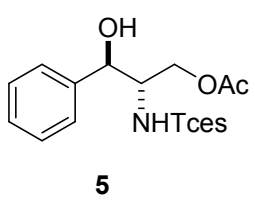

5.37  
5.03  
4.51  
4.48  
4.37  
4.32  
4.30  
4.27  
4.05  
4.02  
3.91  
3.90

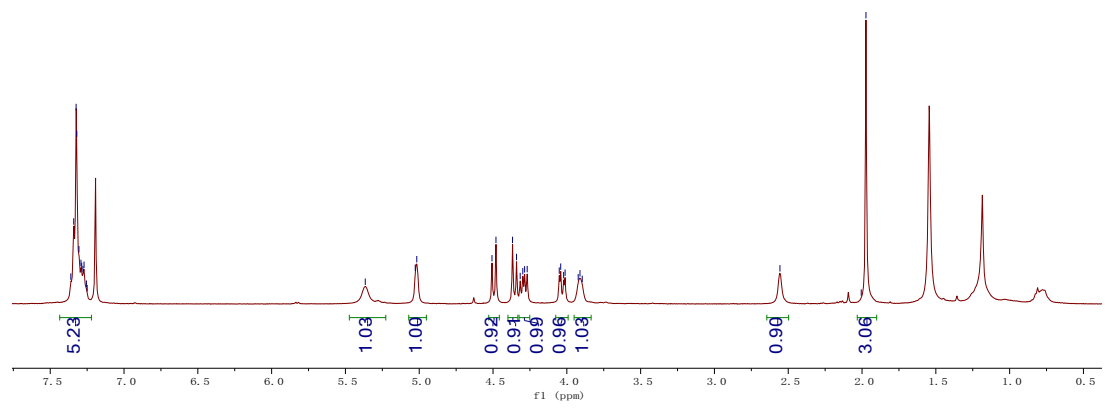

20180904-ShiYF-242P#.21.fid

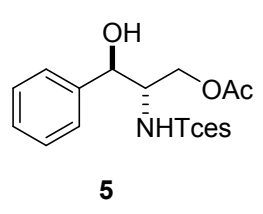

171  
138.16  
128.95  
128.88  
99.98  
78.18  
73.86  
61.84  
59.15  
20.81

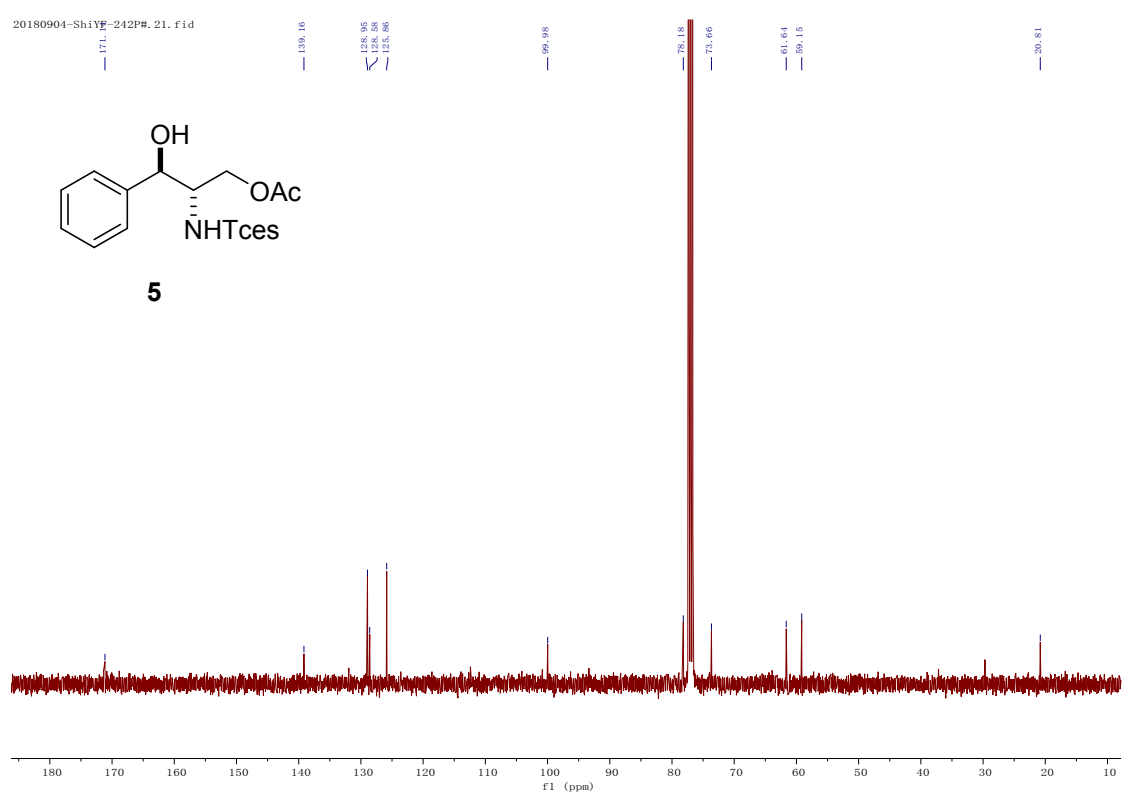

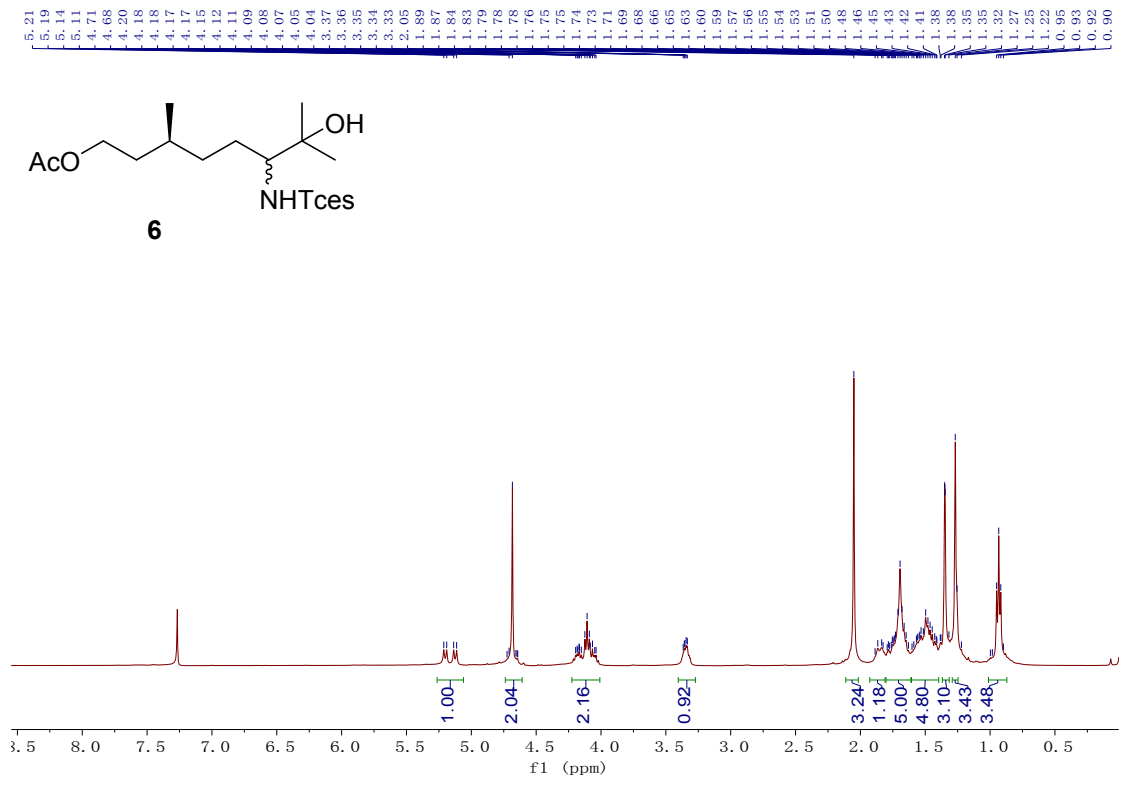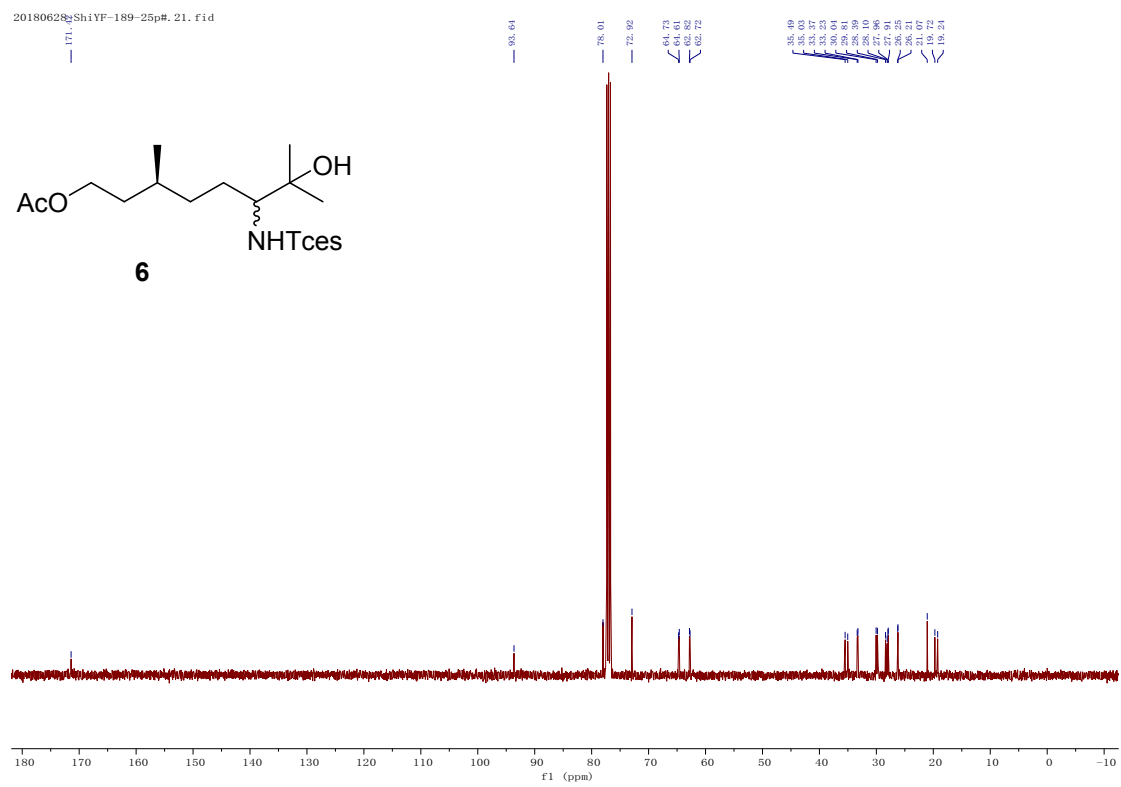

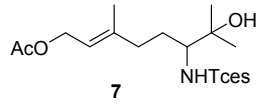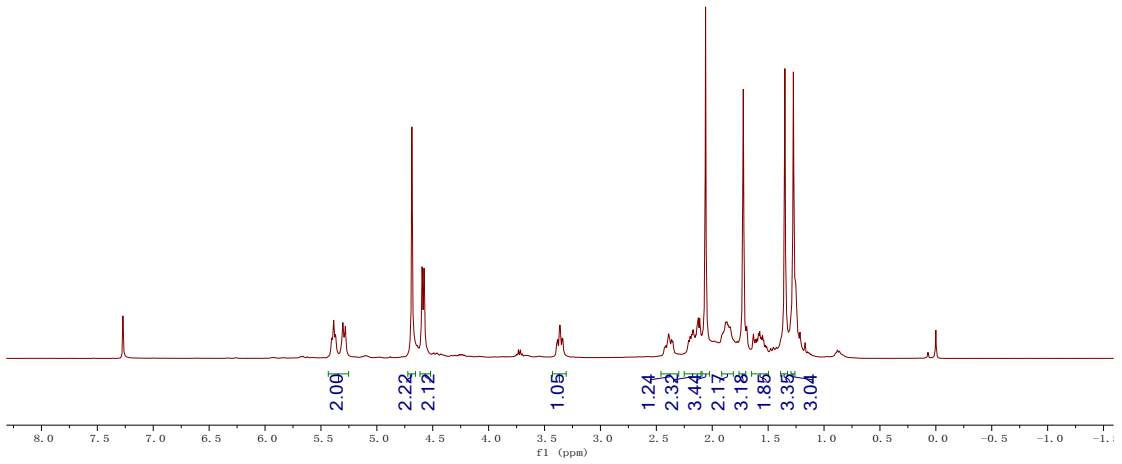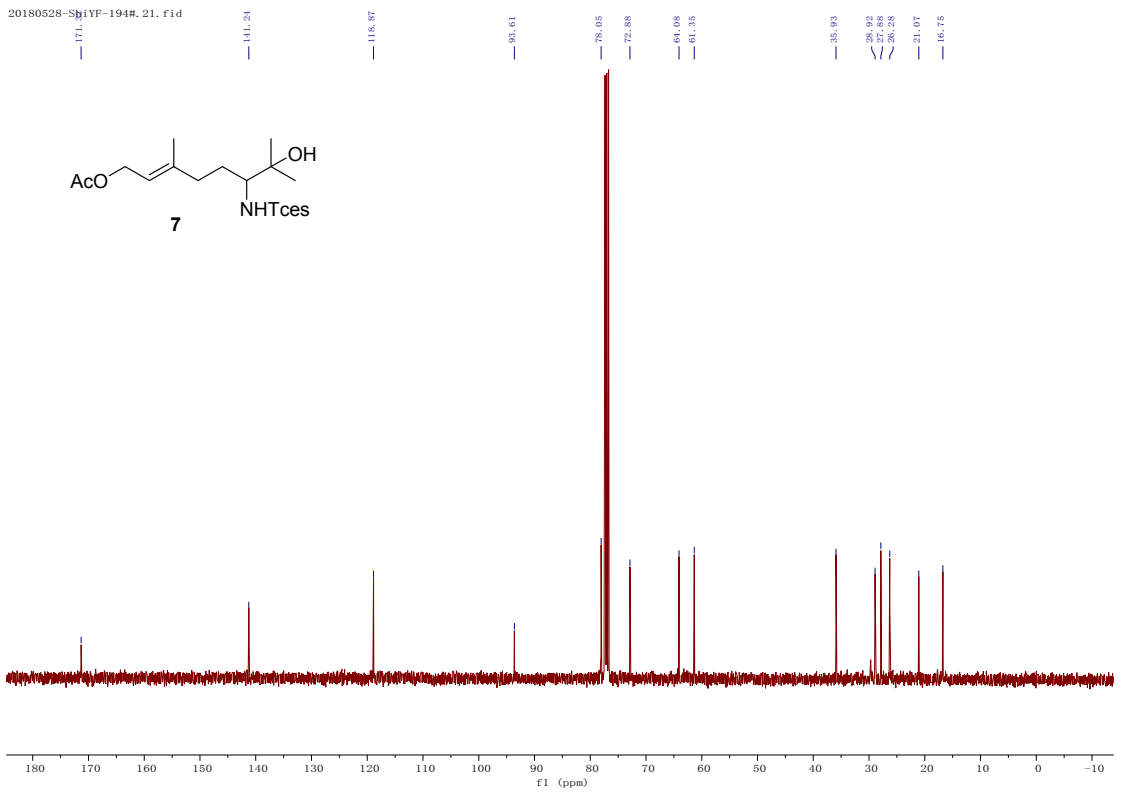

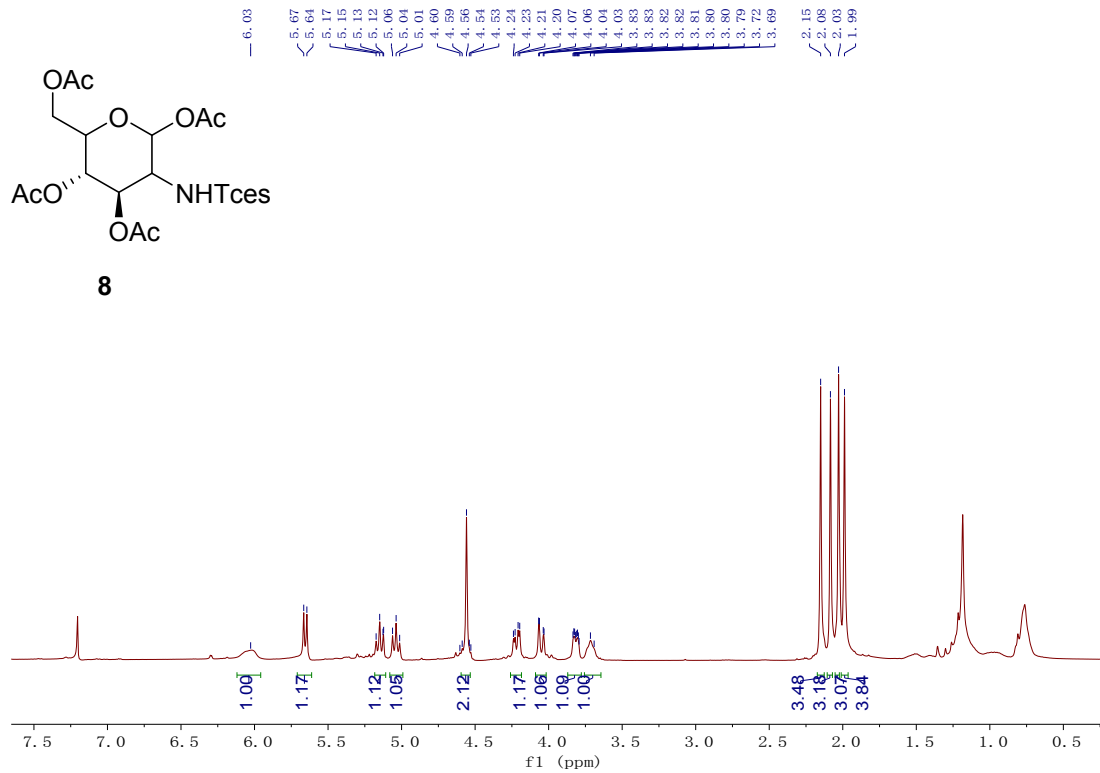

Supplement: c8gc03803a1.pdf [file c8gc03803a1.pdf]
